# Supplementary material for: Разработка конструкта трудового поведения и шкалы экстраролевого трудового поведения
Source: Royal Society of Chemistry journal article supplement (doi:10.1039/d3cp04767a), 2009-01-01
Supplement: d3cp04767a1.pdf [file d3cp04767a1.pdf]

## Supporting Information to

### **Boron-rich Hybrid BCN Nanoribbons as Highly Ambient Uptake of Toxic Gases; H<sub>2</sub>S, HF, NH<sub>3</sub>, CO, CO<sub>2</sub>**

Fatemeh Momen<sup>1</sup>, Farzaneh Shayeganfar<sup>1,2,\*</sup>, Ali Ramazani<sup>3</sup>

<sup>1</sup>Department of Physics and Energy Engineering, Amirkabir University of Technology, Tehran

<sup>2</sup>Department of Aerospace Engineering, University of Michigan, Ann Arbor, MI 10485

<sup>3</sup>Department of Mechanical Engineering, Massachusetts Institute of Technology, Cambridge, MA  
02139, USA

# Contents

|                                                                                                                                                                                          |    |
|------------------------------------------------------------------------------------------------------------------------------------------------------------------------------------------|----|
| 1. The length of bonds in pristine and B-rich nanoribbons with 25%-C and 33%-C (Table S1)                                                                                                | 5  |
| 2. Electrical properties of pristine and B-rich nanoribbons with 25%-C and 33%-C before gas molecule adsorption (Table S2)                                                               | 5  |
| 3. Molecular geometry, adsorption distance, charge transfer, adsorption energy of CO molecule adsorbed on pristine and B-rich nanoribbons with 25%-C and 33%-C (Table S3)                | 6  |
| 4. Electrical properties of pristine and B-rich nanoribbons with 25%-C and 33%-C after CO molecule adsorption (Table S4)                                                                 | 6  |
| 5. Molecular geometry, adsorption distance, charge transfer, adsorption energy of CO <sub>2</sub> molecule adsorbed on pristine and B-rich nanoribbons with 25%-C and 33%-C (Table S5)   | 7  |
| 6. Electrical properties of pristine and B-rich nanoribbons with 25%-C and 33%-C after CO <sub>2</sub> molecule adsorption (Table S6)                                                    | 8  |
| 7. Molecular geometry, adsorption distance, charge transfer, adsorption energy of H <sub>2</sub> S molecule adsorbed on pristine and B-rich nanoribbons with 25%-C and 33%-C (Table S7)  | 9  |
| 8. Electrical properties of pristine and B-rich nanoribbons with 25%-C and 33%-C after H <sub>2</sub> S molecule adsorption (Table S8)                                                   | 10 |
| 9. Molecular geometry, adsorption distance, charge transfer, adsorption energy of HF molecule adsorbed on pristine and B-rich nanoribbons with 25%-C and 33%-C (Table S9)                | 10 |
| 10. Electrical properties of pristine and B-rich nanoribbons with 25%-C and 33%-C after HF molecule adsorption (Table S10)                                                               | 11 |
| 11. Molecular geometry, adsorption distance, charge transfer, adsorption energy of NH <sub>3</sub> molecule adsorbed on pristine and B-rich nanoribbons with 25%-C and 33%-C (Table S11) | 12 |
| 12. Electrical properties of pristine and B-rich nanoribbons with 25%-C and 33%-C after NH <sub>3</sub> molecule adsorption (Table S12)                                                  | 13 |
| 13. SF (sensitivity factor) for tow semiconductor structures, 6-ACBNNR with                                                                                                              | 13 |

|                                                                                                                                                                                   |    |
|-----------------------------------------------------------------------------------------------------------------------------------------------------------------------------------|----|
| 33%-C and 8-ZCBNNR with 25%-C (Table S13)                                                                                                                                         |    |
| 14. Molecular geometry, adsorption distance, charge transfer, adsorption energy of CO molecule adsorbed at the distance of 3 Å above 8-ZCBNNR with 25%-C (Table S14)              | 14 |
| 15. Electrical properties 8-ZCBNNR with 25%-C after CO molecule adsorption at the distance of 3 Å. (Table S15)                                                                    | 14 |
| 16. Molecular geometry, adsorption distance, charge transfer, adsorption energy of NH <sub>3</sub> molecule adsorbed at the distance of 3 Å above 8-ZCBNNR with 25%-C (Table S16) | 15 |
| 17. Electrical properties 8-ZCBNNR with 25%-C after NH <sub>3</sub> molecule adsorption at the distance of 3 Å. (Table S17)                                                       | 15 |
| 18. The geometric configurations, band structure, DOS and PDOS of pristine nanoribbons with 25%-C and 33%-C (Fig. S1)                                                             | 16 |
| 19. The geometric configurations, band structure, DOS and PDOS of B-rich nanoribbons with 25%-C and 33%-C (Fig. S2)                                                               | 17 |
| 20. The geometric configurations of CO molecule on pristine and B-rich nanoribbons with 25%-C and 33%-C (Fig. S3)                                                                 | 18 |
| 21. The band structure, DOS and PDOS of CO molecule adsorbed on pristine and B-rich nanoribbons with 25%-C and 33%-C (Fig. S4)                                                    | 19 |
| 22. The geometric configurations of CO <sub>2</sub> molecule on pristine and B-rich nanoribbons with 25%-C and 33%-C (Fig. S5)                                                    | 20 |
| 23. The band structure, DOS and PDOS of CO <sub>2</sub> molecule adsorbed on pristine and B-rich nanoribbons with 25%-C and 33%-C (Fig. S6)                                       | 21 |
| 24. The geometric configurations of H <sub>2</sub> S molecule on pristine and B-rich nanoribbons with 25%-C and 33%-C (Fig. S7)                                                   | 22 |
| 25. The band structure, DOS and PDOS of H <sub>2</sub> S molecule adsorbed on pristine and B-rich nanoribbons with 25%-C and 33%-C (Fig. S8)                                      | 23 |
| 26. The geometric configurations of HF molecule on pristine and B-rich nanoribbons with 25%-C and 33%-C (Fig. S9)                                                                 | 24 |
| 27. The band structure, DOS and PDOS of HF molecule adsorbed on pristine and B-rich nanoribbons with 25%-C and 33%-C (Fig. S10)                                                   | 25 |
| 28. The geometric configurations of NH <sub>3</sub> molecule on pristine and B-rich                                                                                               | 26 |

|                                                                                                                                              |    |
|----------------------------------------------------------------------------------------------------------------------------------------------|----|
| nanoribbons with 25%-C and 33%-C (Fig. S11)                                                                                                  |    |
| 29. The band structure, DOS and PDOS of NH <sub>3</sub> molecule adsorbed on pristine and B-rich nanoribbons with 25%-C and 33%-C (Fig. S12) | 27 |
| 30. Investigation of adsorption of molecule at the distance of 3 Å above nanoribbon (Fig. S13)                                               | 28 |
| 31. The optimized mesh cutoff energy of pristine and B-rich nanoribbons with 50%-C, 25%-C and 33%-C (Fig. S14)                               | 29 |



**Table S1:** The length of C-B, C-N, B-N and B-B bonds in 6-ACBNNR with 33%-C, 8-ZCBNNR with 25%-C, B-rich 6- ACBNNR with 33%-C and B-rich 8-ZCBNNR with 25%-C. B-B bond is created due to B atoms replacing C atoms in boron-rich nanoribbons.

| <b>nanoribbon \ bond</b>    | <b>C-B</b> | <b>C-N</b> | <b>B-N</b> | <b>B-B</b> |
|-----------------------------|------------|------------|------------|------------|
| 6-ACBNNR with 33%-C         | 1.41 Å     | 1.39 Å     | 1.44 Å     | -          |
| 8-ZCBNNR with 25%-C         | 1.48 Å     | 1.42 Å     | 1.44 Å     | -          |
| B-rich 6- ACBNNR with 33%-C | 1.49 Å     | 1.39 Å     | 1.44 Å     | 1.58 Å     |
| B-rich 8-ZCBNNR with 25%-C  | 1.48 Å     | 1.42 Å     | 1.44 Å     | 1.67 Å     |

**Table S2:** Fermi energy ( $E_F$ ), energy band gap ( $E_g$ ) and electrical conductivity of 6-ACBNNR with 33%-C, 8-ZCBNNR with 25%-C, B-rich 6-ACBNNR with 33%-C and B-rich 8-ZCBNNR with 25%-C before gas molecule adsorption.

| <b>substrate</b>            | <b><math>E_F(eV)</math></b> | <b><math>E_g(eV)</math></b> | <b>electrical conductivity</b> |
|-----------------------------|-----------------------------|-----------------------------|--------------------------------|
| 6-ACBNNR with 33%-C         | -3.318                      | 0.761                       | semiconductor                  |
| 8-ZCBNNR with 25%-C         | -3.303                      | 0.901                       | semiconductor                  |
| B-rich 6- ACBNNR with 33%-C | -3.600                      | 0                           | metal                          |
| B-rich 8-ZCBNNR with 25%-C  | -3.409                      | 0                           | metal                          |

**Table S3:** CO molecule adsorbed on 6-ACBNNR with 33%-C, 8-ZCBNNR with 25%-C, B-rich 6-ACBNNR with 33%-C and B-rich 8-ZCBNNR with 25%-C: the bond length of gas molecule (L), adsorption distance of nearest-neighbor atoms between the gas molecule and substrate (D), the angle of gas molecule ( $\alpha$ ), charge transfer between gas molecule and substrate ( $\Delta Q$ ), the sign "-" means that the molecule is the acceptor of the charge and the sign "+" means the molecule is the donor of the charge, and adsorption energy ( $E_{ads}$ ). The words "before" and "after" express the characteristics of the gas molecule before and after gas molecule adsorption, respectively.

| CO molecule adsorption     |        |       |        |       |              |       |                |                |                    |
|----------------------------|--------|-------|--------|-------|--------------|-------|----------------|----------------|--------------------|
| substrate                  | L (Å)  |       | D (Å)  |       | $\alpha$ (°) |       | $\Delta Q$ (e) | $E_{ads}$ (eV) | Type of adsorption |
|                            | before | after | before | after | before       | after |                |                |                    |
| 6-ACBNNR with 33%-C        | 1.145  | 1.144 | 2.455  | 2.976 | -            | -     | -0.010         | -1.483         | physisorption      |
| 8-ZCBNNR with 25%-C        |        | 1.147 | 2.128  | 3.040 |              | -     | -0.019         | -0.845         | physisorption      |
| B-rich 6-ACBNNR with 33%-C |        | 1.160 | 2.000  | 1.616 |              | -     | +0.124         | -2.275         | chemisorption      |
| B-rich 8-ZCBNNR with 25%-C |        | 1.153 | 2.000  | 1.599 |              | -     | +0.190         | -1.294         | chemisorption      |

**Table S4:** Fermi energy ( $E_F$ ), energy band gap ( $E_g$ ), structural deformation ( $\Delta$ ) and electrical conductivity of 6-ACBNNR with 33%-C, 8-ZCBNNR with 25%-C, B-rich 6-ACBNNR with 33%-C and B-rich 8-ZCBNNR with 25%-C after CO molecule adsorption.

| system                          | $E_F$ (eV) | $E_g$ (eV) | $\Delta$ (Å) | electrical conductivity |
|---------------------------------|------------|------------|--------------|-------------------------|
| 6-ACBNNR with 33%-C + CO        | -3.62      | 0.875      | 1.559        | semiconductor           |
| 8-ZCBNNR with 25%-C + CO        | -3.33      | 0.866      | 0.737        | semiconductor           |
| B-rich 6-ACBNNR with 33%-C + CO | -3.281     | 0          | 1.588        | metal                   |
| B-rich 8-ZCBNNR with 25%-C + CO | -2.950     | 0          | 0.839        | metal                   |

**Table S5:** CO<sub>2</sub> molecule adsorbed on 6-ACBNNR with 33%-C, 8-ZCBNNR with 25%-C, B-rich 6-ACBNNR with 33%-C and B-rich 8-ZCBNNR with 25%-C: the bond length of gas molecule (L), adsorption distance of nearest-neighbor atoms between the gas molecule and substrate (D), the angle of gas molecule ( $\alpha$ ), charge transfer between gas molecule and substrate ( $\Delta Q$ ), the sign "-" means that the molecule is the acceptor of the charge and the sign "+" means the molecule is the donor of the charge, and adsorption energy ( $E_{ads}$ ). The words "before" and "after" express the characteristics of the gas molecule before and after gas molecule adsorption, respectively.

| CO <sub>2</sub> molecule adsorption |                |                                      |        |       |              |         |                |                |                    |
|-------------------------------------|----------------|--------------------------------------|--------|-------|--------------|---------|----------------|----------------|--------------------|
| substrate                           | L (Å)          |                                      | D (Å)  |       | $\alpha$ (°) |         | $\Delta Q$ (e) | $E_{ads}$ (eV) | Type of adsorption |
|                                     | before         | after                                | before | after | before       | after   |                |                |                    |
| 6-ACBNNR with 33%-C                 | C-O1<br>=1.178 | C-O1<br>=1.182<br><br>C-O2<br>=1.178 | 2.016  | 2.982 | 180          | 178.703 | -0.008         | -1.602         | physisorption      |
| 8-ZCBNNR with 25%-C                 | C-O2<br>=1.178 | C-O1<br>=1.181<br><br>C-O2<br>=1.181 | 2.128  | 3.060 |              | 178.571 | -0.013         | -0.998         | physisorption      |
| B-rich 6-ACBNNR<br>with 33%-C       |                | C-O1<br>=1.180<br><br>C-O2<br>=1.179 | 2.022  | 2.968 |              | 179.846 | +0.013         | -1.926         | physisorption      |
| B-rich 8-ZCBNNR<br>with 25%-C       |                | C-O1<br>=1.180<br><br>C-O2<br>=1.181 | 2.027  | 3.001 |              | 178.194 | -0.008         | -1.079         | physisorption      |

**Table S6:** Fermi energy ( $E_F$ ), energy band gap ( $E_g$ ), structural deformation ( $\Delta$ ) and electrical conductivity of 6-ACBNNR with 33%-C, 8-ZCBNNR with 25%-C, B-rich 6-ACBNNR with 33%-C and B-rich 8-ZCBNNR with 25%-C after CO<sub>2</sub> molecule adsorption.

| system                                       | $E_F(eV)$ | $E_g(eV)$ | $\Delta(\text{\AA})$ | electrical conductivity |
|----------------------------------------------|-----------|-----------|----------------------|-------------------------|
| 6-ACBNNR with 33%-C + CO <sub>2</sub>        | -3.295    | 0.875     | 1.549                | semiconductor           |
| 8-ZCBNNR with 25%-C + CO <sub>2</sub>        | -3.270    | 0.884     | 0.730                | semiconductor           |
| B-rich 6-ACBNNR with 33%-C + CO <sub>2</sub> | -3.687    | 0         | 1.584                | metal                   |
| B-rich 8-ZCBNNR with 25%-C + CO <sub>2</sub> | -3.469    | 0         | 0.793                | metal                   |

**Table S7:** H<sub>2</sub>S molecule adsorbed on 6-ACBNNR with 33%-C, 8-ZCBNNR with 25%-C, B-rich 6-ACBNNR with 33%-C and B-rich 8-ZCBNNR with 25%-C: the bond length of gas molecule (L), adsorption distance of nearest-neighbor atoms between the gas molecule and substrate (D), the angle of gas molecule ( $\alpha$ ), charge transfer between gas molecule and substrate ( $\Delta Q$ ), the sign "-" means that the molecule is the acceptor of the charge and the sign "+" means the molecule is the donor of the charge, and adsorption energy ( $E_{ads}$ ). The words "before" and "after" express the characteristics of the gas molecule before and after gas molecule adsorption, respectively.

| <b>H<sub>2</sub>S molecule adsorption</b> |                |                                      |               |              |                                |              |                                  |                                  |                           |
|-------------------------------------------|----------------|--------------------------------------|---------------|--------------|--------------------------------|--------------|----------------------------------|----------------------------------|---------------------------|
| <b>substrate</b>                          | <b>L (Å)</b>   |                                      | <b>D (Å)</b>  |              | <b><math>\alpha</math> (°)</b> |              | <b><math>\Delta Q</math> (e)</b> | <b><math>E_{ads}</math> (eV)</b> | <b>Type of adsorption</b> |
|                                           | <b>before</b>  | <b>after</b>                         | <b>before</b> | <b>after</b> | <b>before</b>                  | <b>after</b> |                                  |                                  |                           |
| 6-ACBNNR with 33%-C                       | S-H1<br>=1.371 | S-H1<br>=1.374<br><br>S-H2<br>=1.371 | 3.635         | 2.930        | 92.033                         | 91.543       | -0.019                           | -1.510                           | physisorption             |
| 8-ZCBNNR with 25%-C                       | S-H2<br>=1.371 | S-H1<br>=1.371<br><br>S-H2<br>=1.370 | 2.128         | 3.239        |                                | 91.267       | -0.009                           | -0.863                           | physisorption             |
| B-rich 6-ACBNNR<br>with 33%-C             |                | S-H1<br>=1.372<br><br>S-H2<br>=1.375 | 3.015         | 2.991        |                                | 91.925       | +0.076                           | -1.972                           | physisorption             |
| B-rich 8-ZCBNNR<br>with 25%-C             |                | S-H1<br>=1.372<br><br>S-H2<br>=1.372 | 2.000         | 3.036        |                                | 92.114       | +0.069                           | -0.992                           | physisorption             |

**Table S8:** Fermi energy ( $E_F$ ), energy band gap ( $E_g$ ), structural deformation ( $\Delta$ ) and electrical conductivity of 6-ACBNNR with 33%-C, 8-ZCBNNR with 25%-C, B-rich 6-ACBNNR with 33%-C and B-rich 8-ZCBNNR with 25%-C after H<sub>2</sub>S molecule adsorption.

| system                                        | $E_F(eV)$ | $E_g(eV)$ | $\Delta(\text{\AA})$ | electrical conductivity |
|-----------------------------------------------|-----------|-----------|----------------------|-------------------------|
| 6-ACBNNR with 33%-C + H <sub>2</sub> S        | -3.280    | 0.857     | 0.812                | semiconductor           |
| 8-ZCBNNR with 25%-C + H <sub>2</sub> S        | -3.100    | 0.875     | 0.745                | semiconductor           |
| B-rich 6-ACBNNR with 33%-C + H <sub>2</sub> S | -3.565    | 0         | 1.644                | metal                   |
| B-rich 8-ZCBNNR with 25%-C + H <sub>2</sub> S | -3.322    | 0         | 0.784                | metal                   |

**Table S9:** HF molecule adsorbed on 6-ACBNNR with 33%-C, 8-ZCBNNR with 25%-C, B-rich 6-ACBNNR with 33%-C and B-rich 8-ZCBNNR with 25%-C: the bond length of gas molecule (L), adsorption distance of nearest-neighbor atoms between the gas molecule and substrate (D), the angle of gas molecule ( $\alpha$ ), charge transfer between gas molecule and substrate ( $\Delta Q$ ), the sign "-" means that the molecule is the acceptor of the charge and the sign "+" means the molecule is the donor of the charge, and adsorption energy ( $E_{ads}$ ). The words "before" and "after" express the characteristics of the gas molecule before and after gas molecule adsorption, respectively.

| HF molecule adsorption     |        |       |        |       |              |       |                |                |                    |
|----------------------------|--------|-------|--------|-------|--------------|-------|----------------|----------------|--------------------|
| substrate                  | L (Å)  |       | D (Å)  |       | $\alpha$ (°) |       | $\Delta Q$ (e) | $E_{ads}$ (eV) | Type of adsorption |
|                            | before | after | before | after | before       | after |                |                |                    |
| 6-ACBNNR with 33%-C        | 0.929  | 0.939 | 3.257  | 2.143 | -            | -     | -0.072         | -1.541         | physisorption      |
| 8-ZCBNNR with 25%-C        |        | 0.930 | 2.772  | 2.659 |              | -     | +0.031         | -0.936         | physisorption      |
| B-rich 6-ACBNNR with 33%-C |        | 0.933 | 2.000  | 2.640 |              | -     | -0.044         | -1.938         | physisorption      |
| B-rich 8-ZCBNNR with 25%-C |        | 0.932 | 2.000  | 2.531 |              | -     | +0.052         | -1.060         | physisorption      |

**Table S10:** Fermi energy ( $E_F$ ), energy band gap ( $E_g$ ), structural deformation ( $\Delta$ ) and electrical conductivity of 6-ACBNNR with 33%-C, 8-ZCBNNR with 25%-C, B-rich 6-ACBNNR with 33%-C and B-rich 8-ZCBNNR with 25%-C after HF molecule adsorption.

| <b>system</b>                   | <b><math>E_F(eV)</math></b> | <b><math>E_g(eV)</math></b> | <b><math>\Delta(\text{\AA})</math></b> | <b>electrical conductivity</b> |
|---------------------------------|-----------------------------|-----------------------------|----------------------------------------|--------------------------------|
| 6-ACBNNR with 33%-C + HF        | -3.295                      | 0.849                       | 1.533                                  | semiconductor                  |
| 8-ZCBNNR with 25%-C + HF        | -3.350                      | 0.875                       | 0.734                                  | semiconductor                  |
| B-rich 6-ACBNNR with 33%-C + HF | -3.569                      | 0                           | 1.661                                  | metal                          |
| B-rich 8-ZCBNNR with 25%-C + HF | -3.300                      | 0                           | 0.773                                  | metal                          |

**Table S11:** NH<sub>3</sub> molecule adsorbed on 6-ACBNNR with 33%-C, 8-ZCBNNR with 25%-C, B-rich 6-ACBNNR with 33%-C and B-rich 8-ZCBNNR with 25%-C: the bond length of gas molecule (L), adsorption distance of nearest-neighbor atoms between the gas molecule and substrate (D), the angle of gas molecule ( $\alpha$ ), charge transfer between gas molecule and substrate ( $\Delta Q$ ), the sign "-" means that the molecule is the acceptor of the charge and the sign "+" means the molecule is the donor of the charge, and adsorption energy ( $E_{ads}$ ). The words "before" and "after" express the characteristics of the gas molecule before and after gas molecule adsorption, respectively.

| NH <sub>3</sub> molecule adsorption |                |                                                            |        |       |                     |                                                                           |                |                |                    |
|-------------------------------------|----------------|------------------------------------------------------------|--------|-------|---------------------|---------------------------------------------------------------------------|----------------|----------------|--------------------|
| substrate                           | L (Å)          |                                                            | D (Å)  |       | $\alpha$ (°)        |                                                                           | $\Delta Q$ (e) | $E_{ads}$ (eV) | Type of adsorption |
|                                     | before         | after                                                      | before | after | before              | after                                                                     |                |                |                    |
| 6-ACBNNR with 33%-C                 | N-H1<br>=1.041 | N-H1<br>=1.042<br><br>N-H2<br>=1.041<br><br>N-H3<br>=1.041 | 2.455  | 3.077 | H1-N-H2<br>=105.504 | H1-N-H2<br>=105.788<br><br>H1-N-H3<br>=105.515<br><br>H2-N-H3<br>=105.585 | +0.030         | -1.542         | physisorption      |
| 8-ZCBNNR with 25%-C                 | N-H2<br>=1.041 | N-H1<br>=1.043<br><br>N-H2<br>=1.042<br><br>N-H3<br>=1.039 | 2.000  | 2.884 | H1-N-H3<br>=105.504 | H1-N-H2<br>=106.068<br><br>H1-N-H3<br>=106.140<br><br>H2-N-H3<br>=105.893 | +0.034         | -0.973         | physisorption      |
| B-rich 6-ACBNNR<br>with 33%-C       | N-H3<br>=1.041 | N-H1<br>=1.047<br><br>N-H2<br>=1.051<br><br>N-H3<br>=1.043 | 2.134  | 1.699 | H2-N-H3<br>=105.512 | H1-N-H2<br>=108.661<br><br>H1-N-H3<br>=108.391<br><br>H2-N-H3<br>=109.365 | +0.404         | -2.411         | chemisorption      |
| B-rich 8-ZCBNNR<br>with 25%-C       |                | N-H1<br>=1.043<br><br>N-H2<br>=1.060<br><br>N-H3<br>=1.043 | 2.133  | 1.706 |                     | H1-N-H2<br>=108.434<br><br>H1-N-H3<br>=109.162<br><br>H2-N-H3<br>=108.434 | +0.405         | -1.492         | chemisorption      |



**Table S12:** Fermi energy ( $E_F$ ), energy band gap ( $E_g$ ), structural deformation ( $\Delta$ ) and electrical conductivity of 6-ACBNNR with 33%-C, 8-ZCBNNR with 25%-C, B-rich 6-ACBNNR with 33%-C and B-rich 8-ZCBNNR with 25%-C after  $\text{NH}_3$  molecule adsorption.

| system                                     | $E_F(\text{eV})$ | $E_g(\text{eV})$ | $\Delta(\text{\AA})$ | electrical conductivity |
|--------------------------------------------|------------------|------------------|----------------------|-------------------------|
| 6-ACBNNR with 33%-C + $\text{NH}_3$        | -3.158           | 0.857            | 1.546                | semiconductor           |
| 8-ZCBNNR with 25%-C + $\text{NH}_3$        | -3.000           | 0.849            | 0.766                | semiconductor           |
| B-rich 6-ACBNNR with 33%-C + $\text{NH}_3$ | -2.860           | 0                | 1.610                | metal                   |
| B-rich 8-ZCBNNR with 25%-C + $\text{NH}_3$ | -2.760           | 0                | 0.865                | metal                   |

**Table S13:** SF (sensitivity factor) for tow semiconductor structures, 6-ACBNNR with 33%-C and 8-ZCBNNR with 25%-C.

| system                                     | SF (sensitivity factor) | system                                     | SF (sensitivity factor) |
|--------------------------------------------|-------------------------|--------------------------------------------|-------------------------|
| 6-ACBNNR with 33%-C + CO                   | 14.98%                  | 8-ZCBNNR with 25%-C + CO                   | 3.88%                   |
| 6-ACBNNR with 33%-C + $\text{CO}_2$        | 14.98%                  | 8-ZCBNNR with 25%-C + $\text{CO}_2$        | 1.88%                   |
| 6-ACBNNR with 33%-C + $\text{H}_2\text{S}$ | 12.61%                  | 8-ZCBNNR with 25%-C + $\text{H}_2\text{S}$ | 2.88%                   |
| 6-ACBNNR with 33%-C + HF                   | 11.56%                  | 8-ZCBNNR with 25%-C + HF                   | 2.88%                   |
| 6-ACBNNR with 33%-C + $\text{NH}_3$        | 12.61%                  | 8-ZCBNNR with 25%-C + $\text{NH}_3$        | 5.77%                   |

**Table S14:** CO molecule adsorbed at the distance of 3 Å above 8-ZCBNNR with 25%-C : the bond length of gas molecule (L), adsorption distance of nearest-neighbor atoms between the gas molecule and substrate (D), the angle of gas molecule ( $\alpha$ ), charge transfer between gas molecule and substrate ( $\Delta Q$ ), the sign "-" means that the molecule is the acceptor of the charge and the sign "+" means the molecule is the donor of the charge, and adsorption energy ( $E_{ads}$ ). The words "before" and "after" express the characteristics of the gas molecule before and after gas molecule adsorption, respectively.

| CO molecule adsorption at the distance of 3 Å |        |       |        |       |              |       |                |                |                    |
|-----------------------------------------------|--------|-------|--------|-------|--------------|-------|----------------|----------------|--------------------|
| substrate                                     | L (Å)  |       | D (Å)  |       | $\alpha$ (°) |       | $\Delta Q$ (e) | $E_{ads}$ (eV) | Type of adsorption |
|                                               | before | after | before | after | before       | after |                |                |                    |
| 8-ZCBNNR with 25%-C                           | 1.145  | 1.149 | 3.561  | 2.958 | -            | -     | - 0.013        | -0.950         | physisorption      |

**Table S15:** Fermi energy ( $E_F$ ), energy band gap ( $E_g$ ), structural deformation ( $\Delta$ ) and electrical conductivity of 8-ZCBNNR with 25%-C after CO molecule adsorption at the distance of 3 Å.

| system                   | $E_F$ (eV) | $E_g$ (eV) | $\Delta$ (Å) | electrical conductivity |
|--------------------------|------------|------------|--------------|-------------------------|
| 8-ZCBNNR with 25%-C + CO | -3.5       | 0.857      | 0.738        | semiconductor           |

**Table S16:** NH<sub>3</sub> molecule adsorbed at the distance of 3 Å above 8-ZCBNNR with 25%-C : the bond length of gas molecule (L), adsorption distance of nearest-neighbor atoms between the gas molecule and substrate (D), the angle of gas molecule ( $\alpha$ ), charge transfer between gas molecule and substrate ( $\Delta Q$ ), the sign "-" means that the molecule is the acceptor of the charge and the sign "+" means the molecule is the donor of the charge, and adsorption energy ( $E_{ads}$ ). The words "before" and "after" express the characteristics of the gas molecule before and after gas molecule adsorption, respectively.

| NH <sub>3</sub> molecule adsorption at the distance of 3 Å |                |                                                            |        |       |                     |                                                                           |                |                |                    |
|------------------------------------------------------------|----------------|------------------------------------------------------------|--------|-------|---------------------|---------------------------------------------------------------------------|----------------|----------------|--------------------|
| substrate                                                  | L (Å)          |                                                            | D (Å)  |       | $\alpha$ (°)        |                                                                           | $\Delta Q$ (e) | $E_{ads}$ (eV) | Type of adsorption |
|                                                            | before         | after                                                      | before | after | before              | after                                                                     |                |                |                    |
| 8-ZCBNNR with 25%-C                                        | N-H2<br>=1.041 | N-H1<br>=1.042<br><br>N-H2<br>=1.041<br><br>N-H3<br>=1.041 | 3.372  | 2.832 | H1-N-H3<br>=105.504 | H1-N-H2<br>=105.867<br><br>H1-N-H3<br>=106.093<br><br>H2-N-H3<br>=106.231 | + 0.053        | -0.907         | physisorption      |

**Table S17:** Fermi energy ( $E_F$ ), energy band gap ( $E_g$ ), structural deformation ( $\Delta$ ) and electrical conductivity of 8-ZCBNNR with 25%-C after NH<sub>3</sub> molecule adsorption at the distance of 3 Å.

| system                                | $E_F$ (eV) | $E_g$ (eV) | $\Delta$ (Å) | electrical conductivity |
|---------------------------------------|------------|------------|--------------|-------------------------|
| 8-ZCBNNR with 25%-C + NH <sub>3</sub> | -3.00      | 0.848      | 0.755        | semiconductor           |

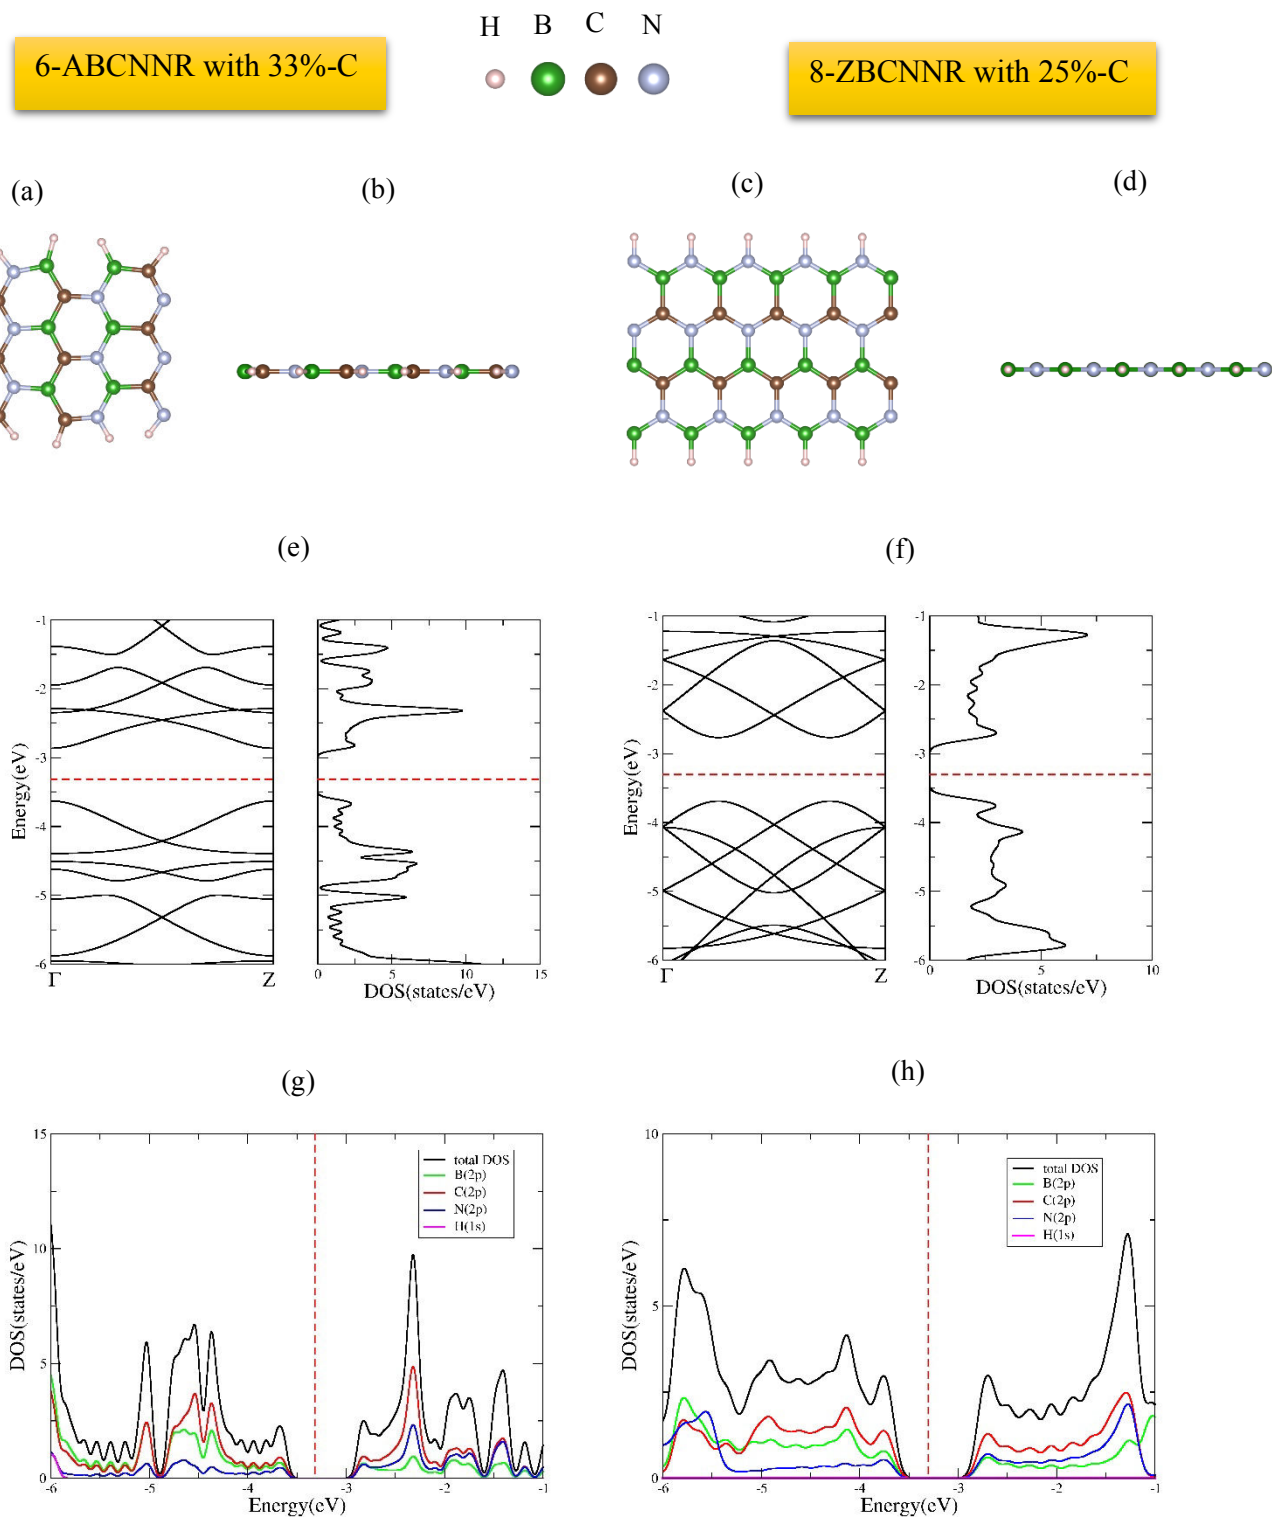

**Fig. S1** Top view and side view of the geometric configurations of 6-ACBNNR with 33%-C (a, b) and 8-ZCBNNR with 25%-C (c, d), band structure and DOS of 6-ACBNNR with 33%-C (e) and 8-ZCBNNR with 25%-C (f), PDOS of 6-ACBNNR with 33%-C (g) and 8-ZCBNNR with 25%-C (h). The Fermi level indicated by the red dashed line

H B C N

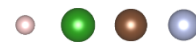

B-rich 6-ABCNNR with 33%-C

B-rich 8-ZBCNNR with 25%-C

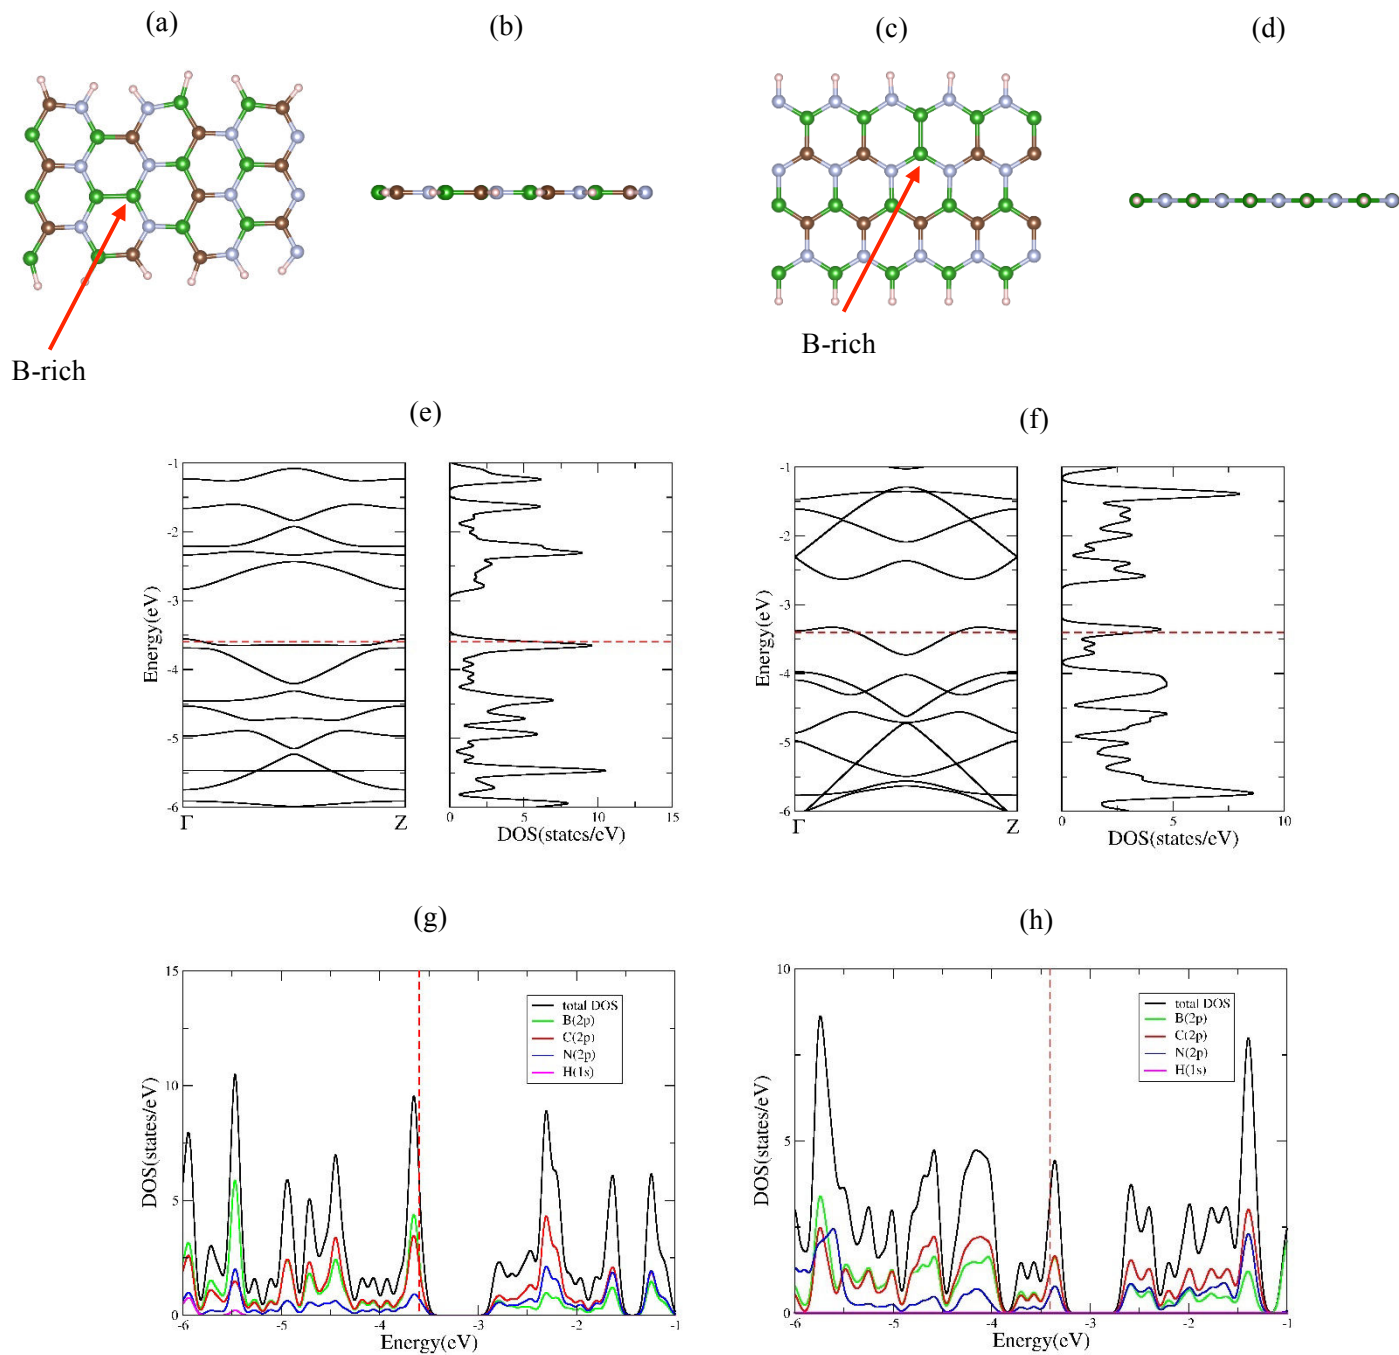

**Fig. S2** Top view and side view of the geometric configurations of B-rich 6-ABCNNR with 33%-C (a, b) and B-rich 8-ZBCNNR with 25%-C (c, d), band structure and DOS of B-rich 6-ABCNNR with 33%-C (e) and B-rich 8-ZBCNNR with 25%-C (f), PDOS of B-rich 6-ABCNNR with 33%-C (g) and B-rich 8-ZBCNNR with 50%-C (h). The Fermi level indicated by the red dashed line.

# Geometric Configurations Of CO Molecule Adsorption

H B C N O

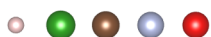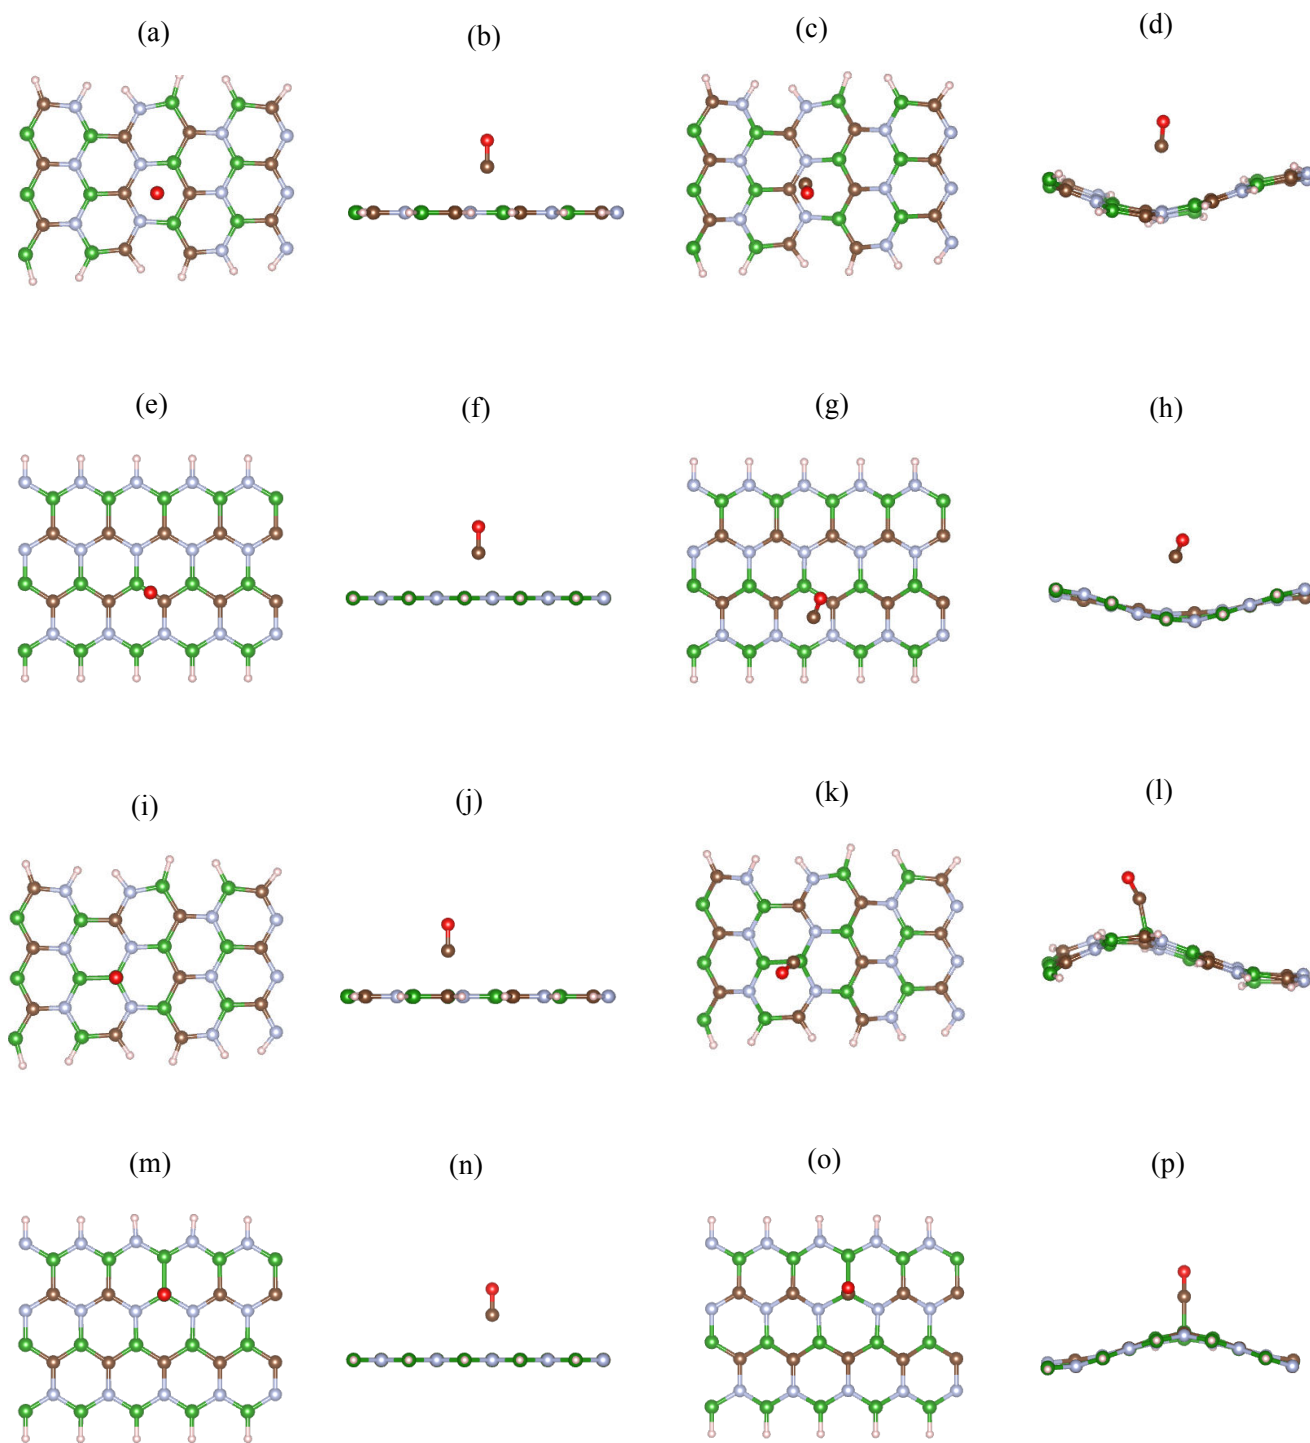

**Fig. S3** Top view and side view of the geometric configurations of CO molecule on 6-ACBNNR with 33%-C before (a, b) and after (c, d) optimization, 8-ZCBNNR with 25%-C before (e, f) and after (g, h) optimization, B-rich 6-ACBNNR with 33%-C before (i, j) and after (k, l) optimization, B-rich 8-ZCBNNR with 25%-C before (m, n) and after (o, p) optimization.

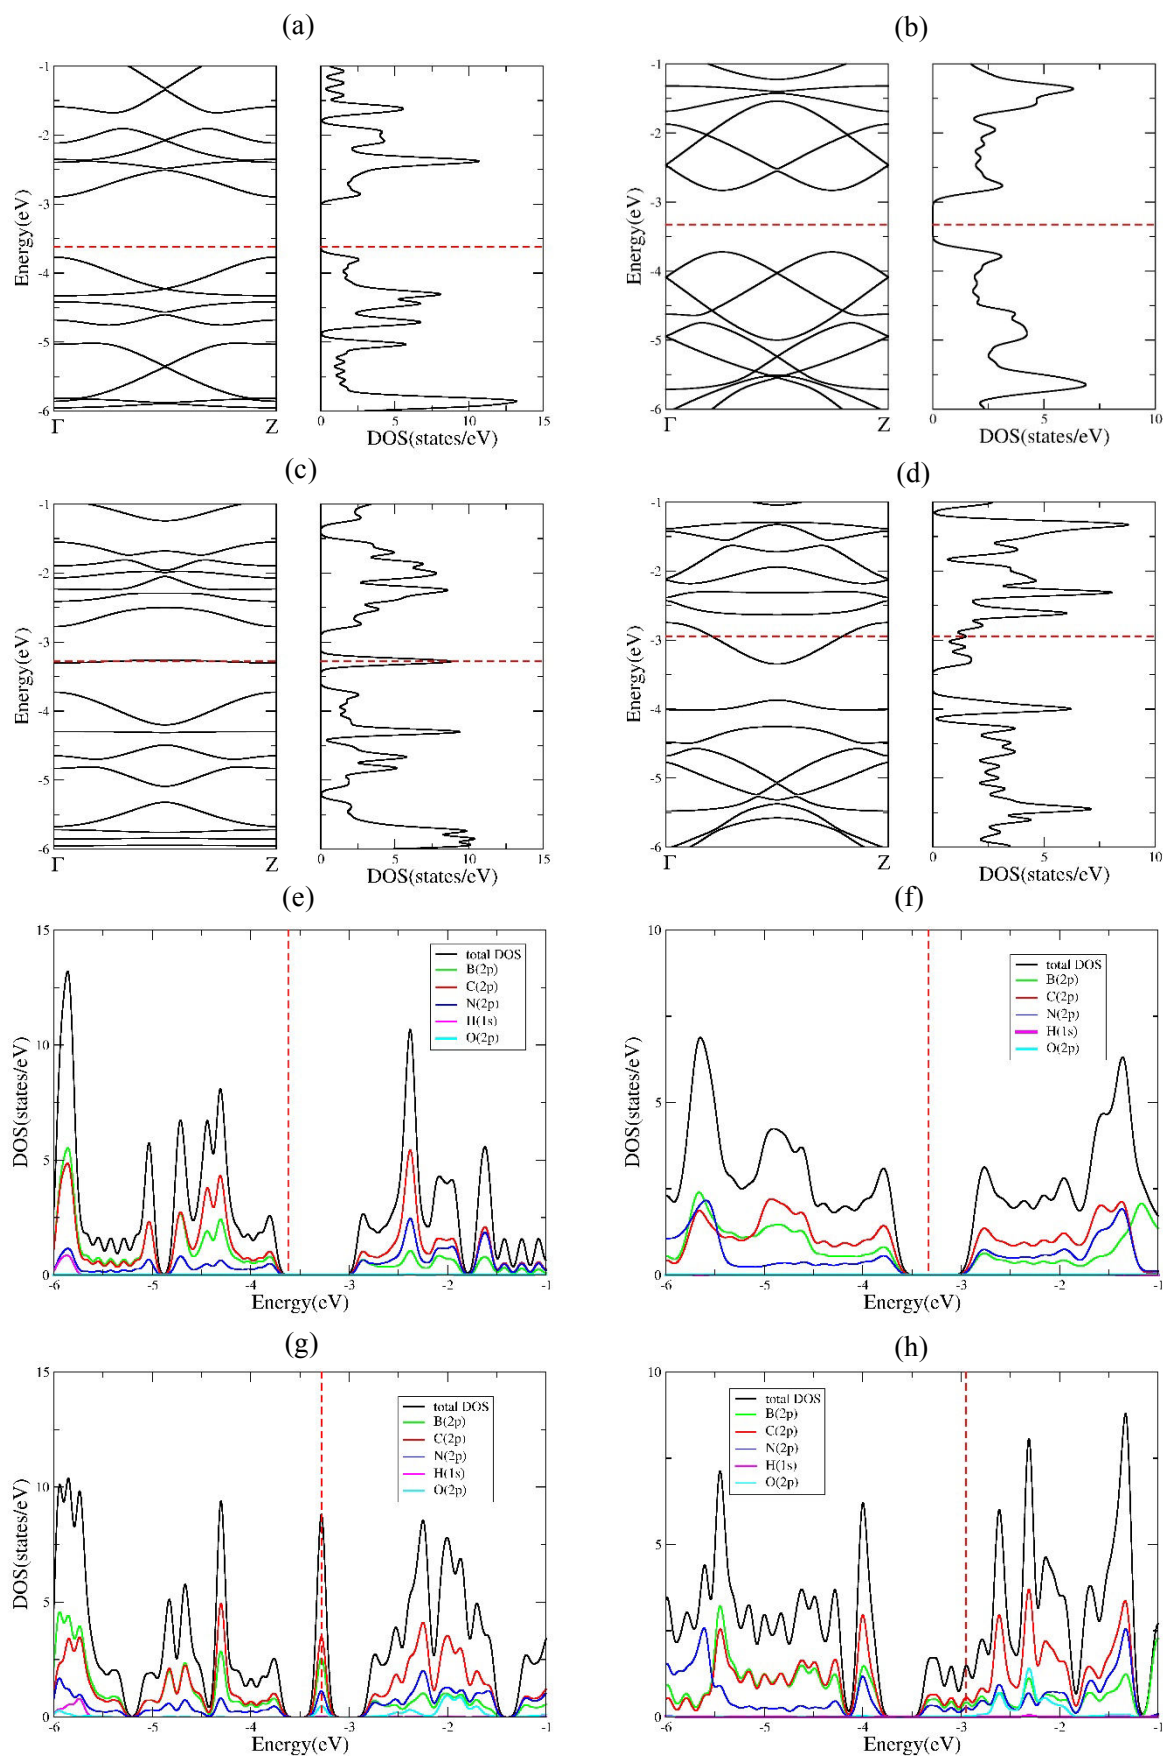

**Fig. S4** Band structure and DOS of CO molecule adsorbed on 6-ACBNR with 33%-C (a), 8-ZCBNNR with 25%-C (b), B-rich 6-ACBNR with 33%-C (c), B-rich 8-ZCBNNR with 25%-C (d). PDOS of CO molecule adsorbed on 6-ACBNR with 33%-C (e), 8-ZCBNNR with 25%-C (f), B-rich 6-ACBNR with 33%-C (g), B-rich 8-ZCBNNR with 25%-C (h). The Fermi level indicated by the red dashed line.



# Geometric Configurations Of CO<sub>2</sub> Molecule Adsorption

H B C N O

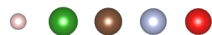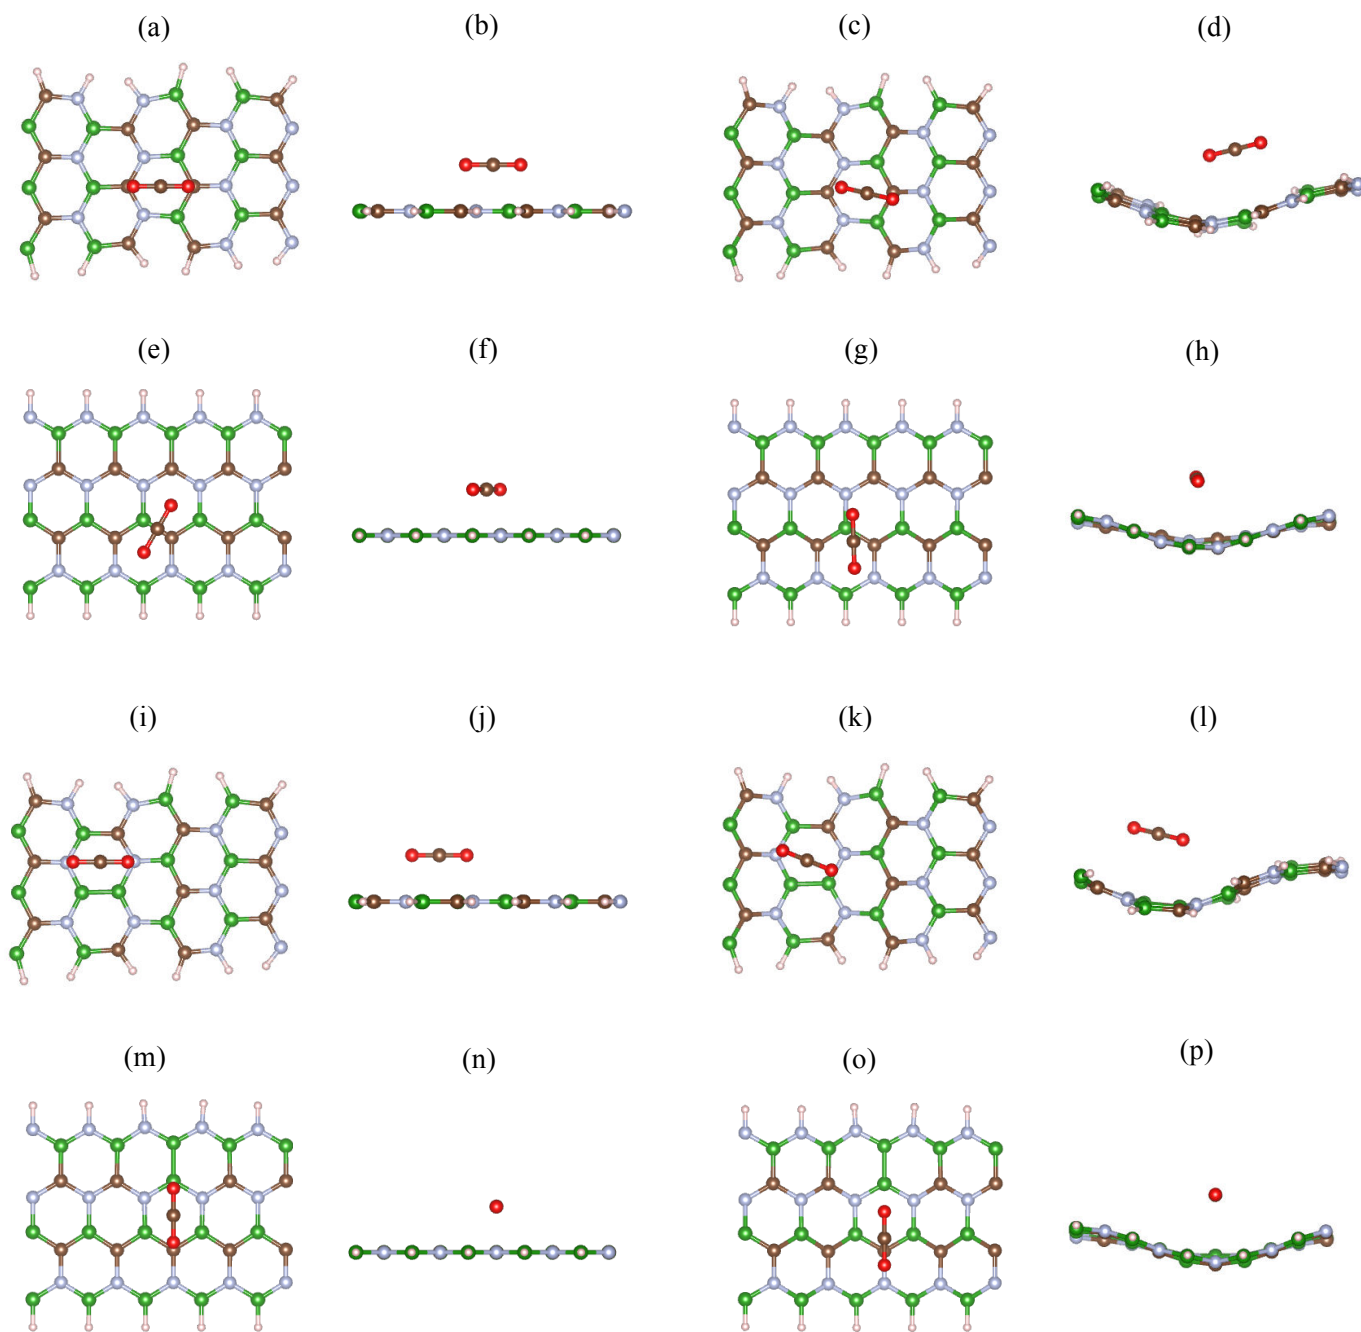

**Fig. S5** Top view and side view of the geometric configurations of CO<sub>2</sub> molecule on 6-ACBNNR with 33%-C before (a, b) and after (c, d) optimization, 8-ZCBNNR with 25%-C before (e, f) and after (g, h) optimization, B-rich 6-ACBNNR with 33%-C before (i, j) and after (k, l) optimization, B-rich 8-ZCBNNR with 25%-C before (m, n) and after (o, p) optimization.



# Electronic Properties Of CO<sub>2</sub> Molecule Adsorption

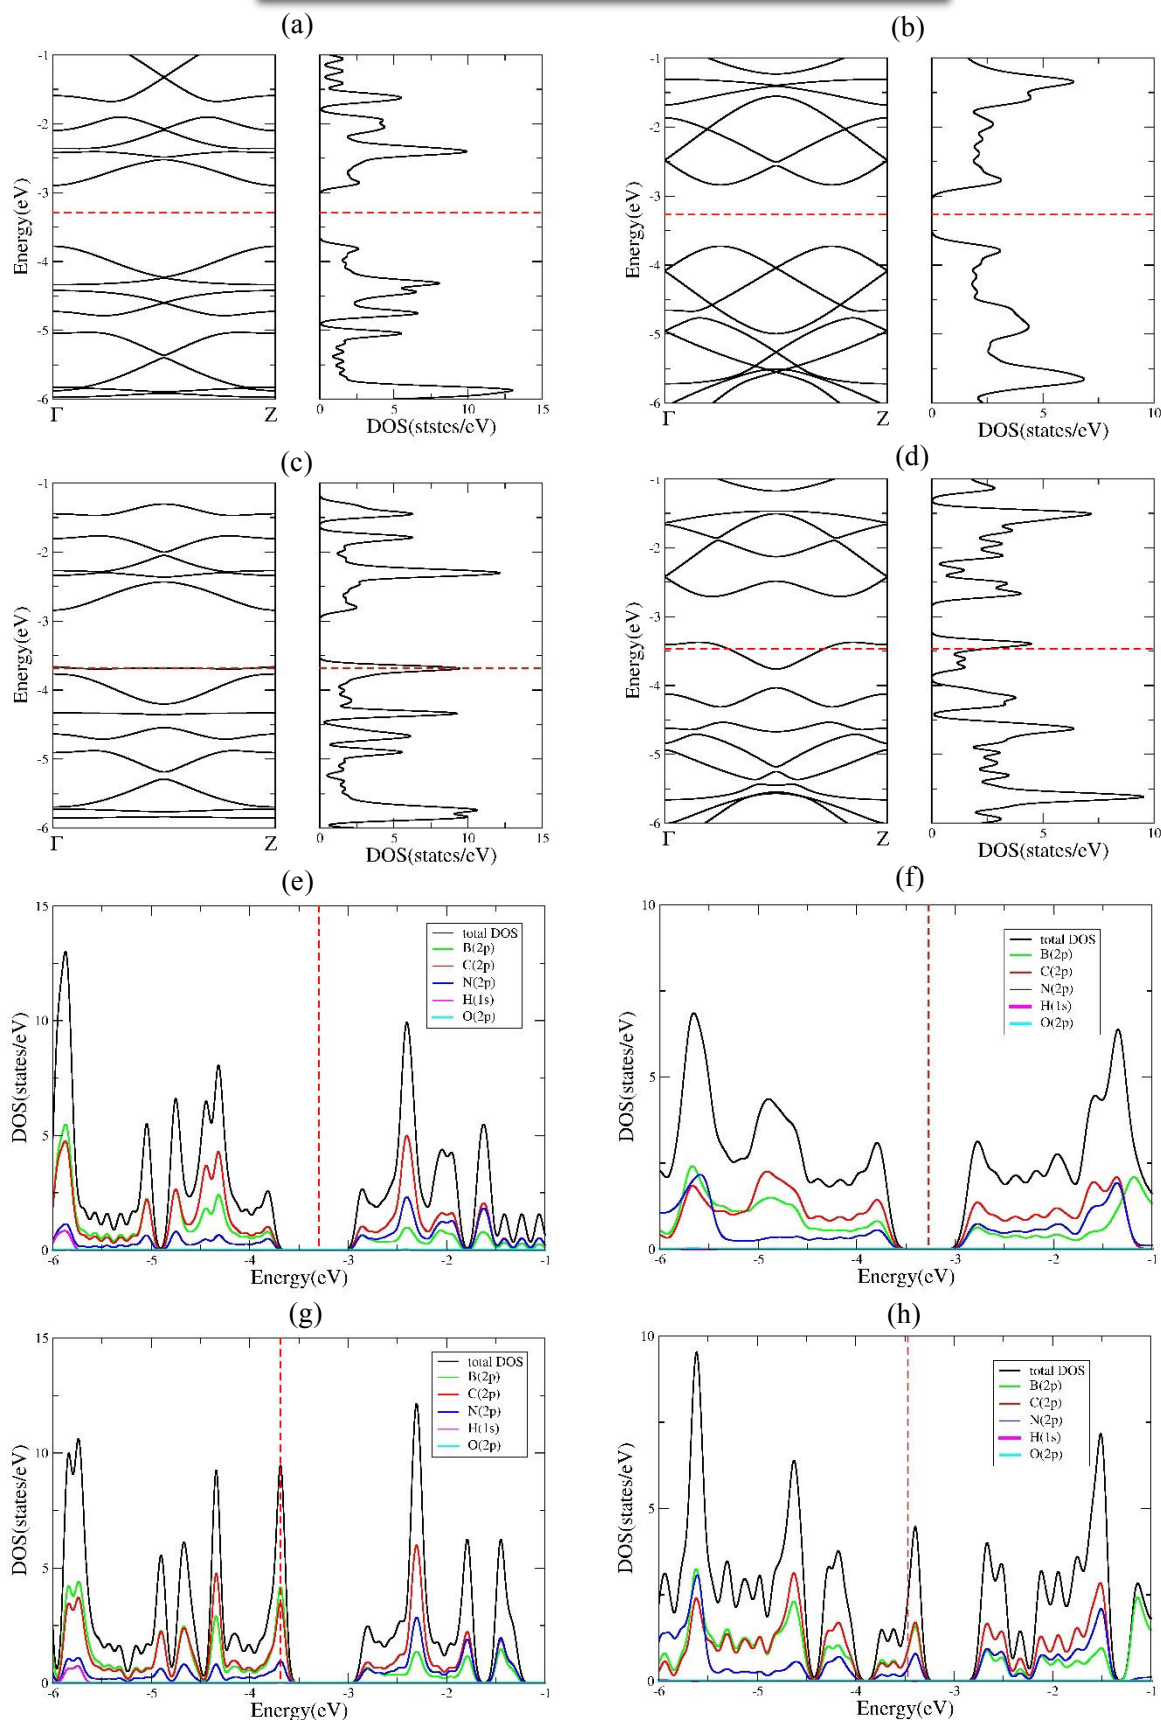

**Fig. S6** Band structure and DOS of CO<sub>2</sub> molecule adsorbed on 6-ACBNNR with 33%-C (a), 8-ZCBNNR with 25%-C (b), B-rich 6-ACBNNR with 33%-C (c), B-rich 8-ZCBNNR with 25%-C (d). PDOS of CO molecule adsorbed on 6-ACBNNR with 33%-C (e), 8-ZCBNNR with 25%-C (f), B-rich 6-ACBNNR with 33%-C (g), B-rich 8-ZCBNNR with 25%-C (h). The Fermi level indicated by the red dashed line

H B C N S

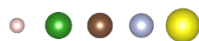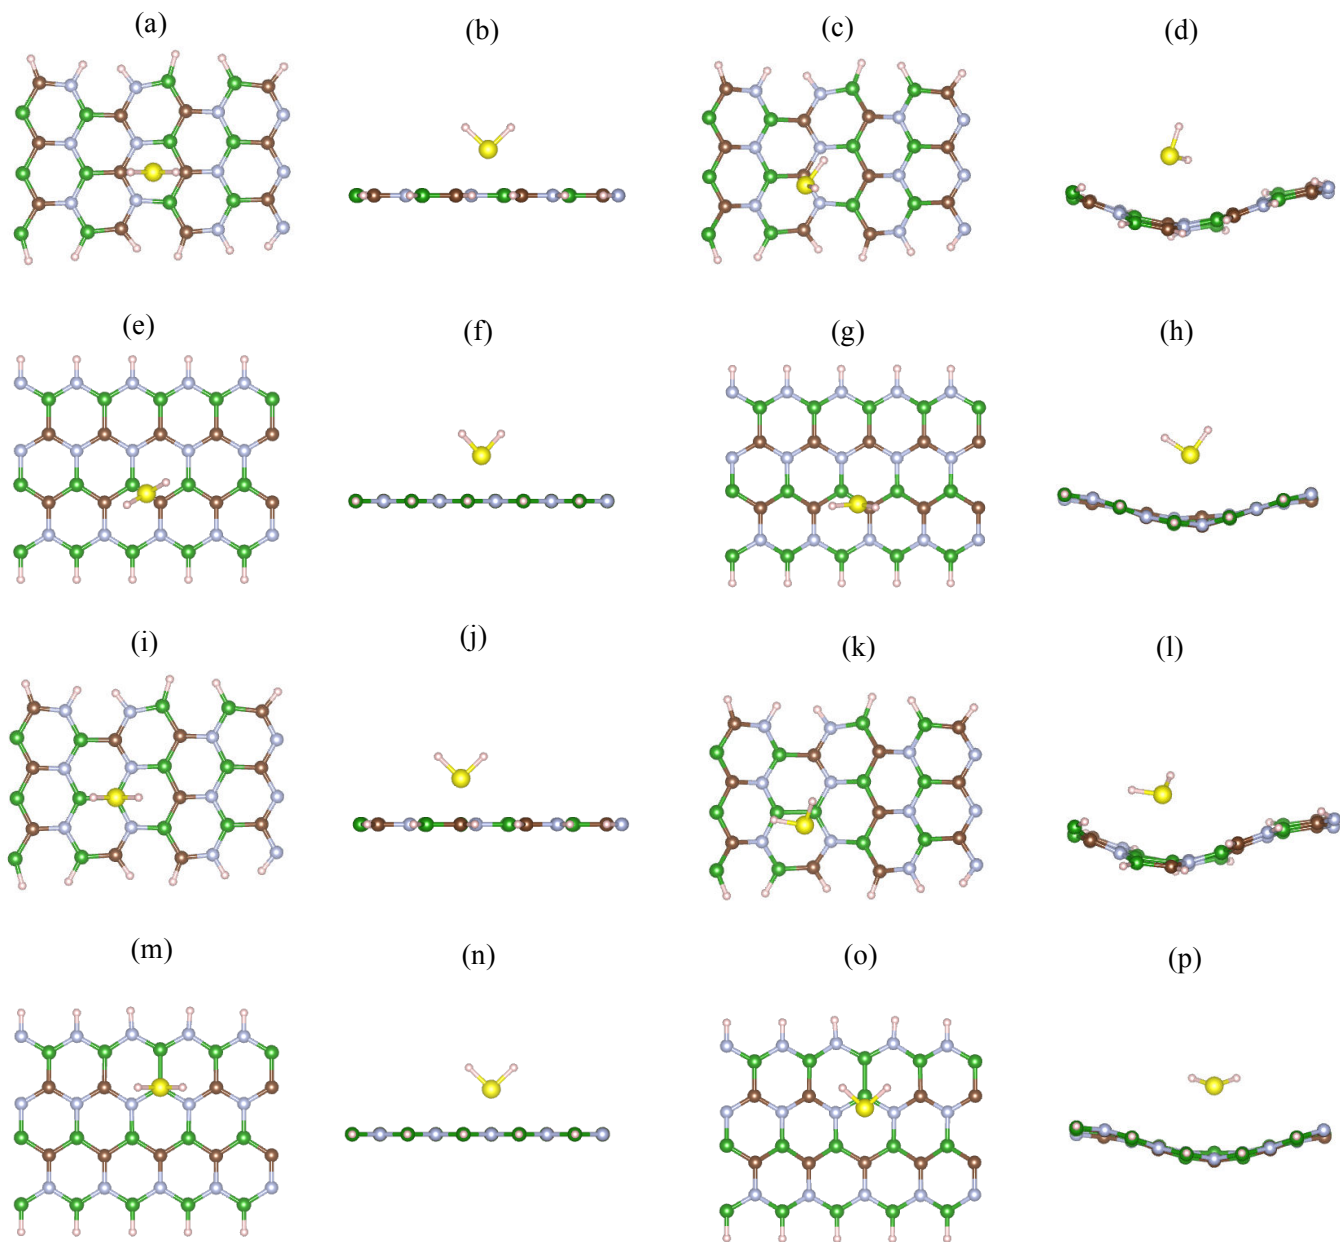

**Fig. S7** Top view and side view of the geometric configurations of H<sub>2</sub>S molecule on 6-ACBNNR with 33%-C before (a, b) and after (c, d) optimization, 8-ZCBNNR with 25%-C before (e, f) and after (g, h) optimization, B-rich 6-ACBNNR with 33%-C before (i, j) and after (k, l) optimization, B-rich 8-ZCBNNR with 25%-C before (m, n) and after (o, p) optimization.

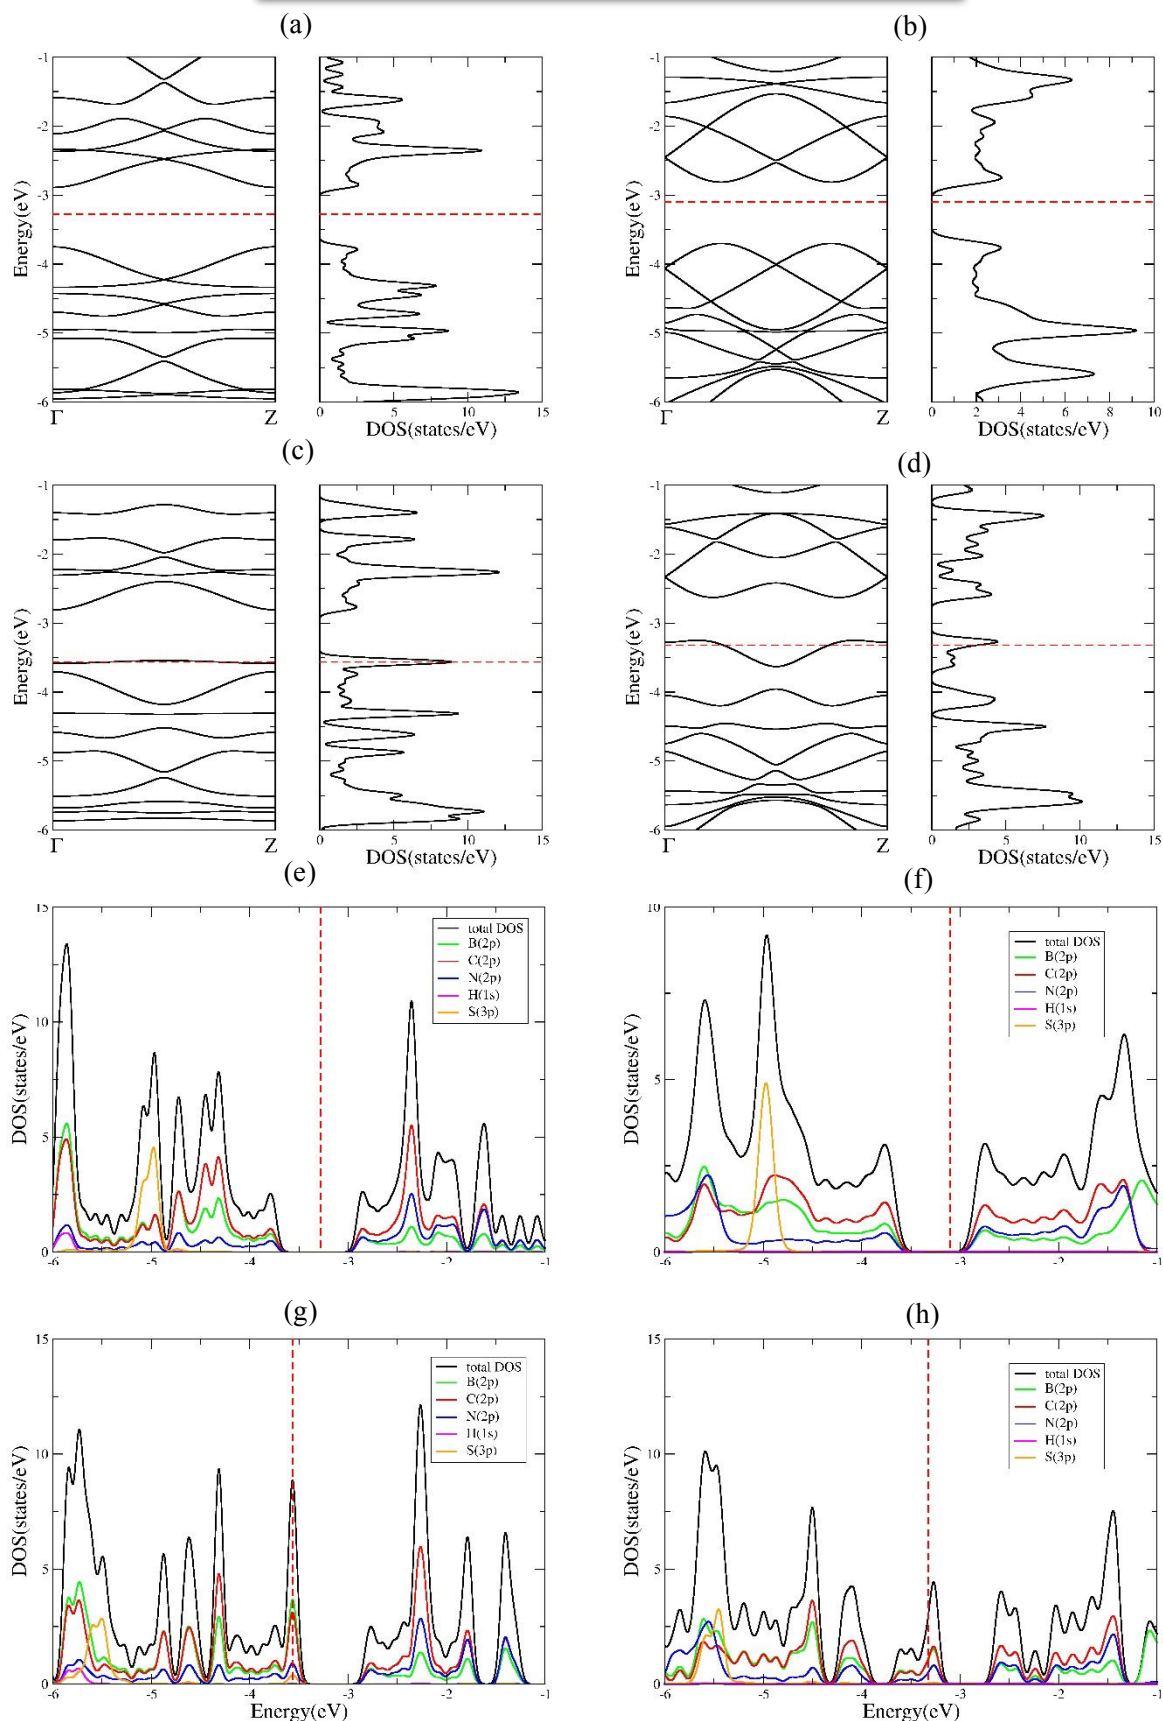

**Fig. S8** Band structure and DOS of H<sub>2</sub>S molecule adsorbed on 6-ACBNR with 33%-C (a), 8-ZCBNNR with 25%-C (b), B-rich 6-ACBNR with 33%-C (c), B-rich 8-ZCBNNR with 25%-C (d). PDOS of CO molecule adsorbed on 6-ACBNR with 33%-C (e), 8-ZCBNNR with 25%-C (f), B-rich 6-ACBNR with 33%-C (g), B-rich 8-ZCBNNR with 25%-C (h). The Fermi level indicated by the red dashed line.

# Geometric Configurations Of HF Molecule Adsorption

H B C N F

● ● ● ● ●

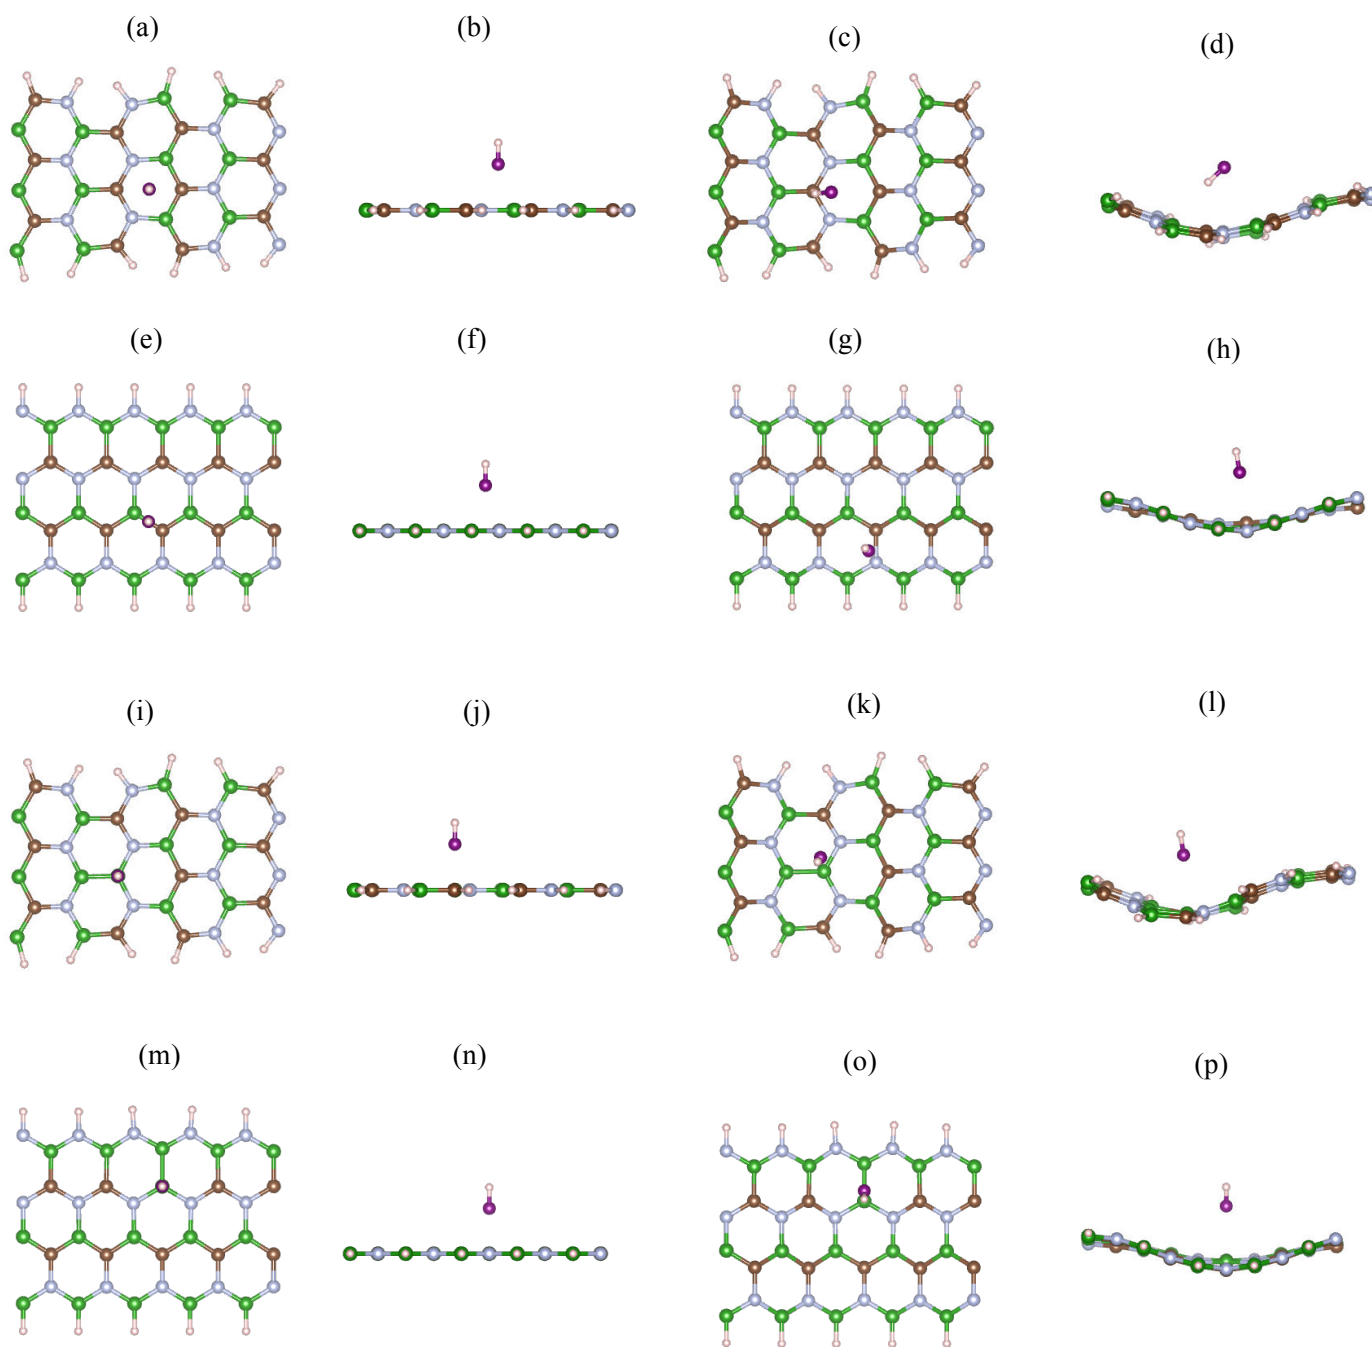

**Fig. S9** Top view and side view of the geometric configurations of HF molecule on 6-ACBNNR with 33%-C before (a, b) and after (c, d) optimization, 8-ZCBNNR with 25%-C before (e, f) and after (g, h) optimization, B-rich 6-ACBNNR with 33%-C before (i, j) and after (k, l) optimization, B-rich 8-ZCBNNR with 25%-C before (m, n) and after (o, p) optimization.



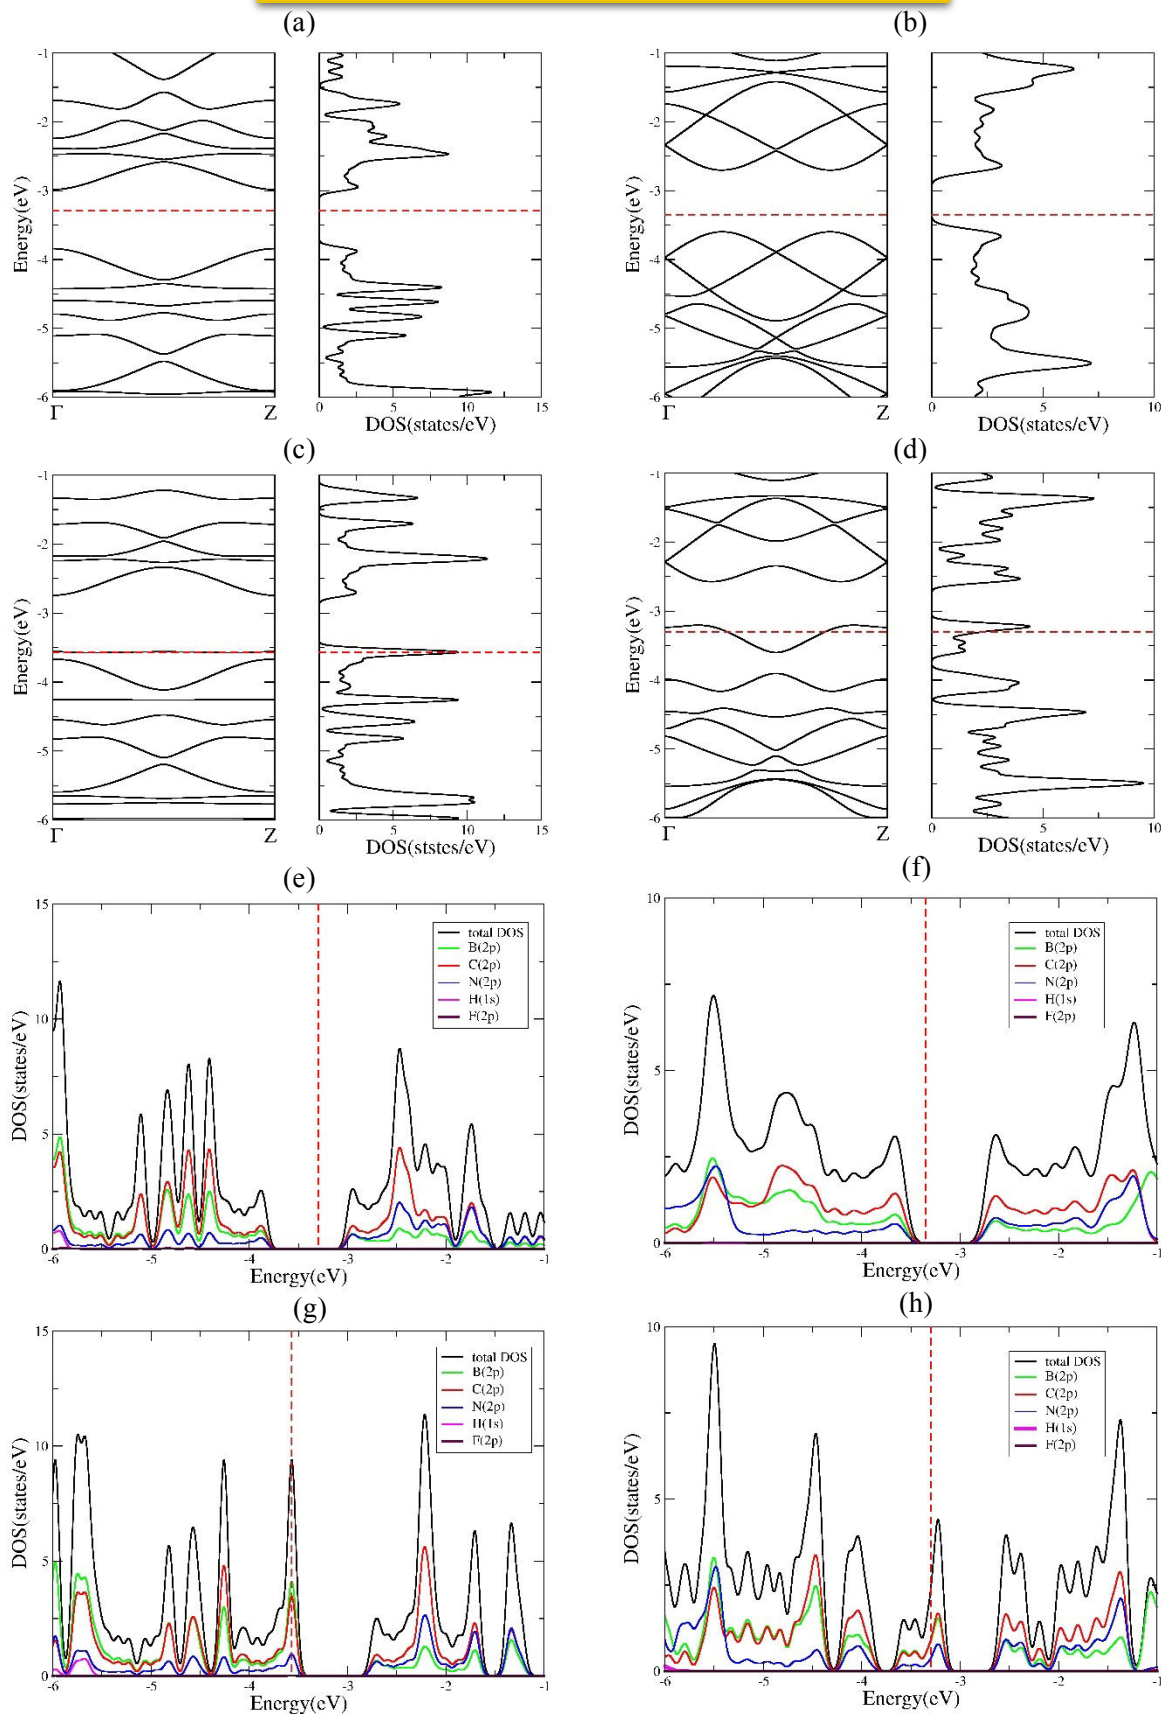

**Fig. S10** Band structure and DOS of HF molecule adsorbed on 6-ACBNNR with 33%-C (a), 8-ZCBNNR with 25%-C (b), B-rich 6-ACBNNR with 33%-C (c), B-rich 8-ZCBNNR with 25%-C (d). PDOS of CO molecule adsorbed on 6-ACBNNR with 33%-C (e), 8-ZCBNNR<sub>25</sub> with 25%-C (f), B-rich 6-ACBNNR with 33%-C (g), B-rich 8-ZCBNNR with 25%-C (h). The Fermi level indicated by the red dashed line.

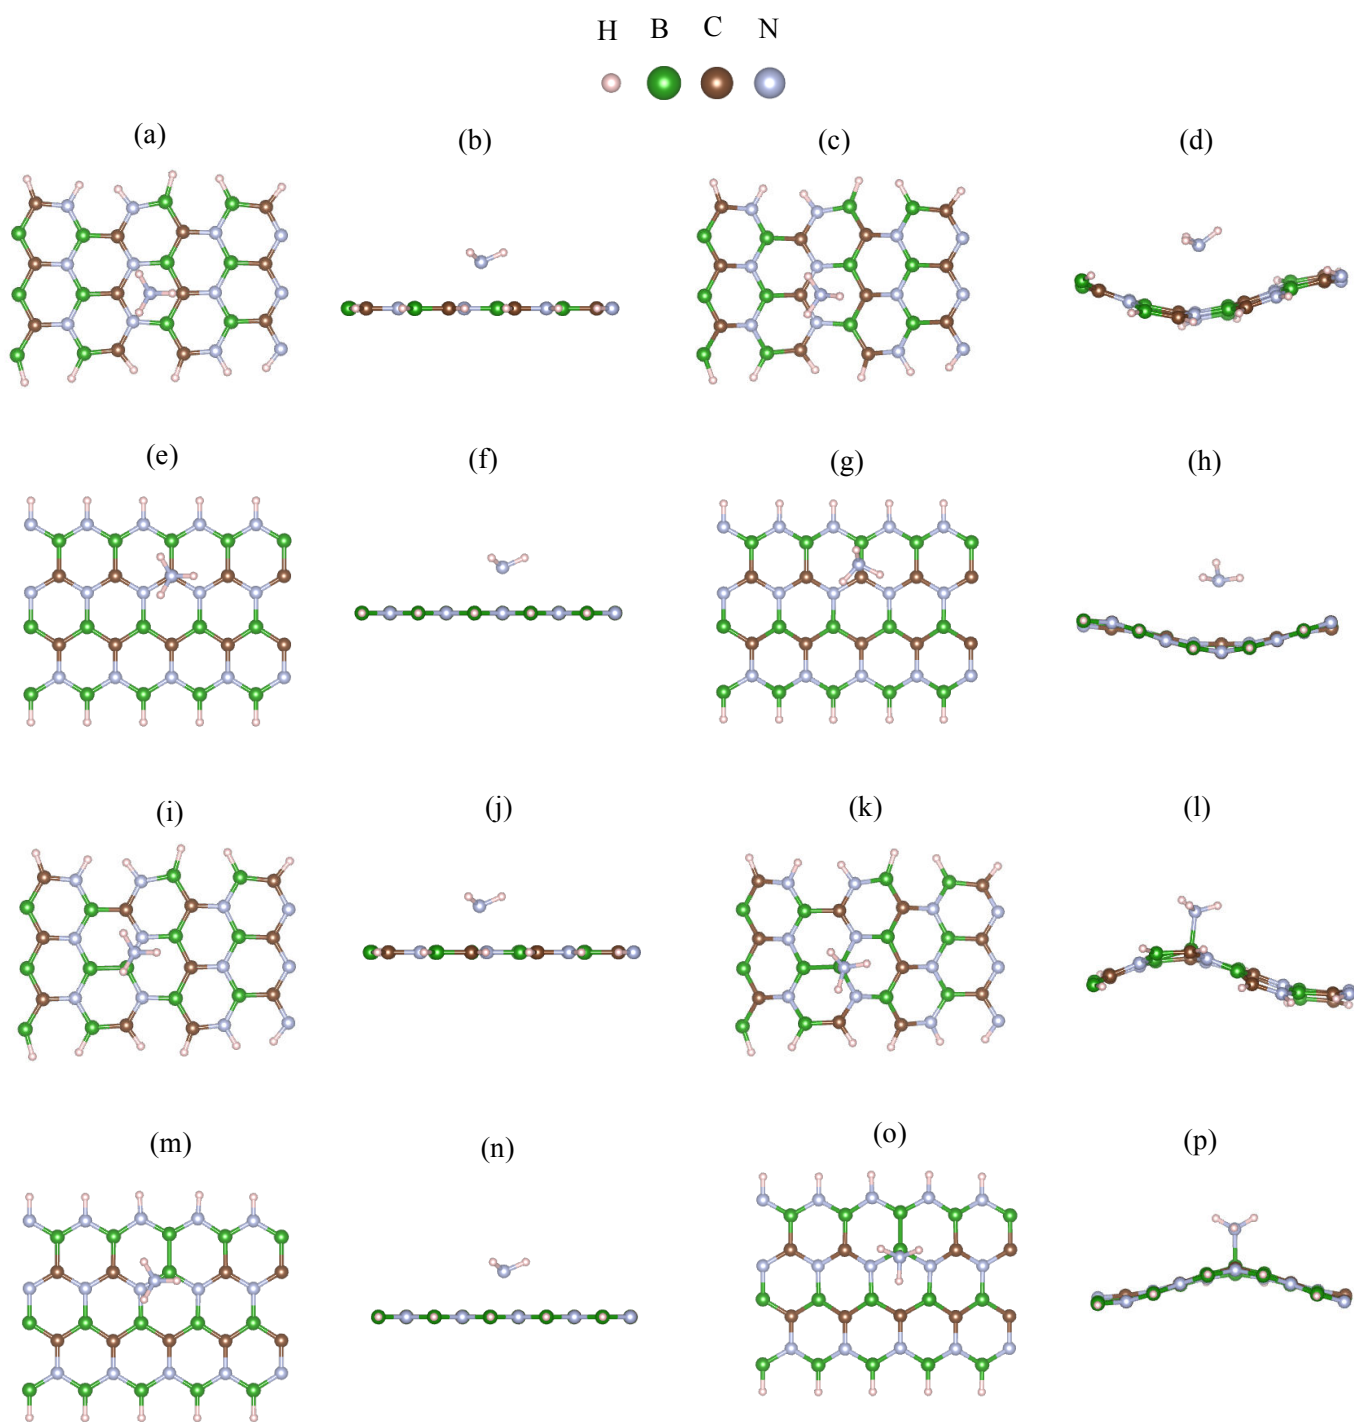

**Fig. S11** Top view and side view of the geometric configurations of  $\text{NH}_3$  molecule on 6-ACBNR with 33%-C before (a, b) and after (c, d) optimization, 8-ZCBNNR with 25%-C before (e, f) and after (g, h) optimization, B-rich 6-ACBNR with 33%-C before (i, j) and after (k, l) optimization, B-rich 8-ZCBNNR with 25%-C before (m, n) and after (o, p) optimization.

## Electronic Properties Of NH<sub>3</sub> Molecule Adsorption

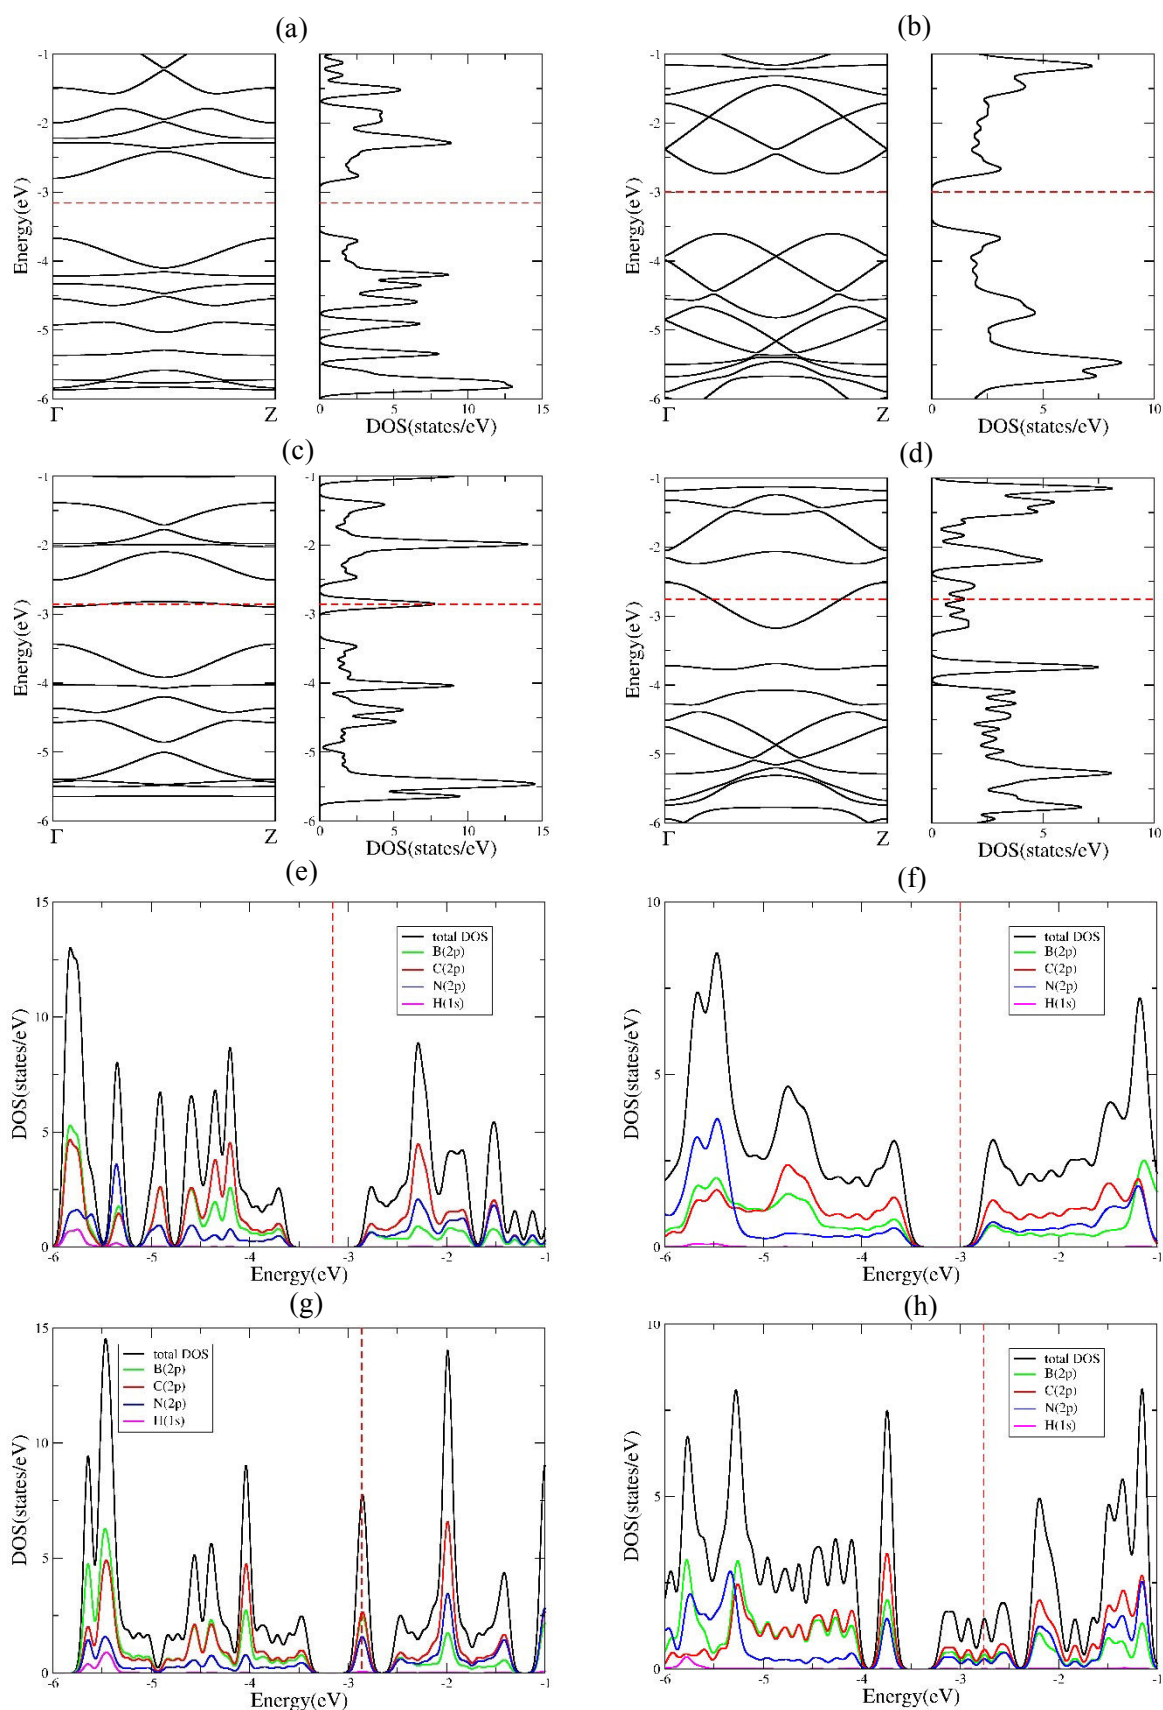

**Fig. S12** Band structure and DOS of NH<sub>3</sub> molecule adsorbed on 6-ACBNNR with 33%-C (a), 8-ZCBNNR with 25%-C (b), B-rich 6-ACBNNR with 33%-C (c), B-rich 8-ZCBNNR with 25%-C (d). PDOS of CO molecule adsorbed on 6-ACBNNR with 33%-C (e), 8-ZCBNNR with 25%-C (f), B-rich 6-ACBNNR with 33%-C (g), B-rich 8-ZCBNNR with 25%-C (h). The Fermi level indicated by the red dashed line.

H B C N O

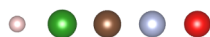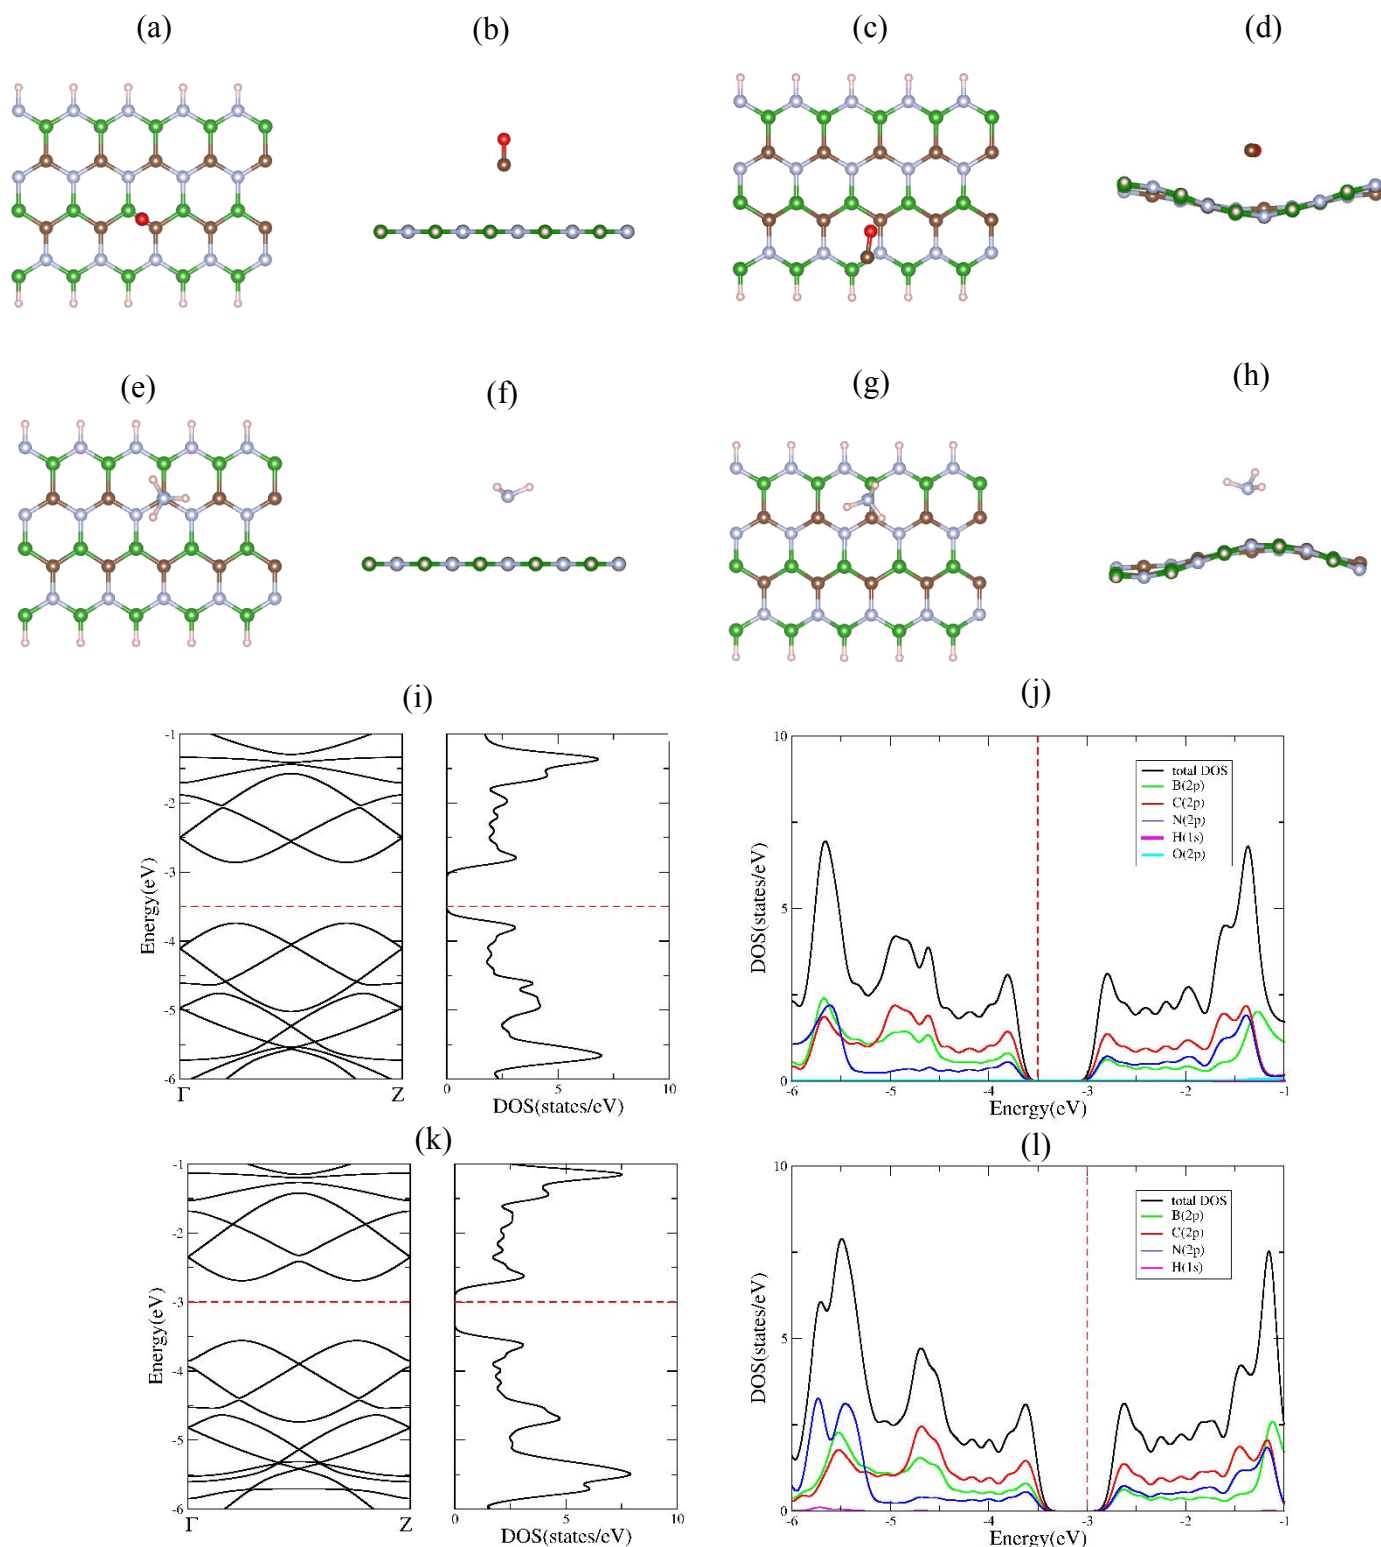

**Fig. S13** Investigation of adsorption of molecule at the distance of 3 Å above nanoribbon: Top view and side view of the geometric configurations of CO molecule on 8-ZCBNNR with 25%-C before (a, b) and after (c, d) optimization and top view and side view of the geometric configurations of NH<sub>3</sub> molecule on 8-ZCBNNR with 25%-C before (e, f) and after (g, h) optimization. (i) Band structure and DOS and (j) PDOS of CO molecule adsorbed on 8-ZCBNNR with 25%-C. (k) Band structure and DOS and (l) PDOS of NH<sub>3</sub> molecule adsorbed on 8-ZCBNNR with 25%-C. The Fermi level indicated by the red dashed line.



## Mesh Cutoff Optimization

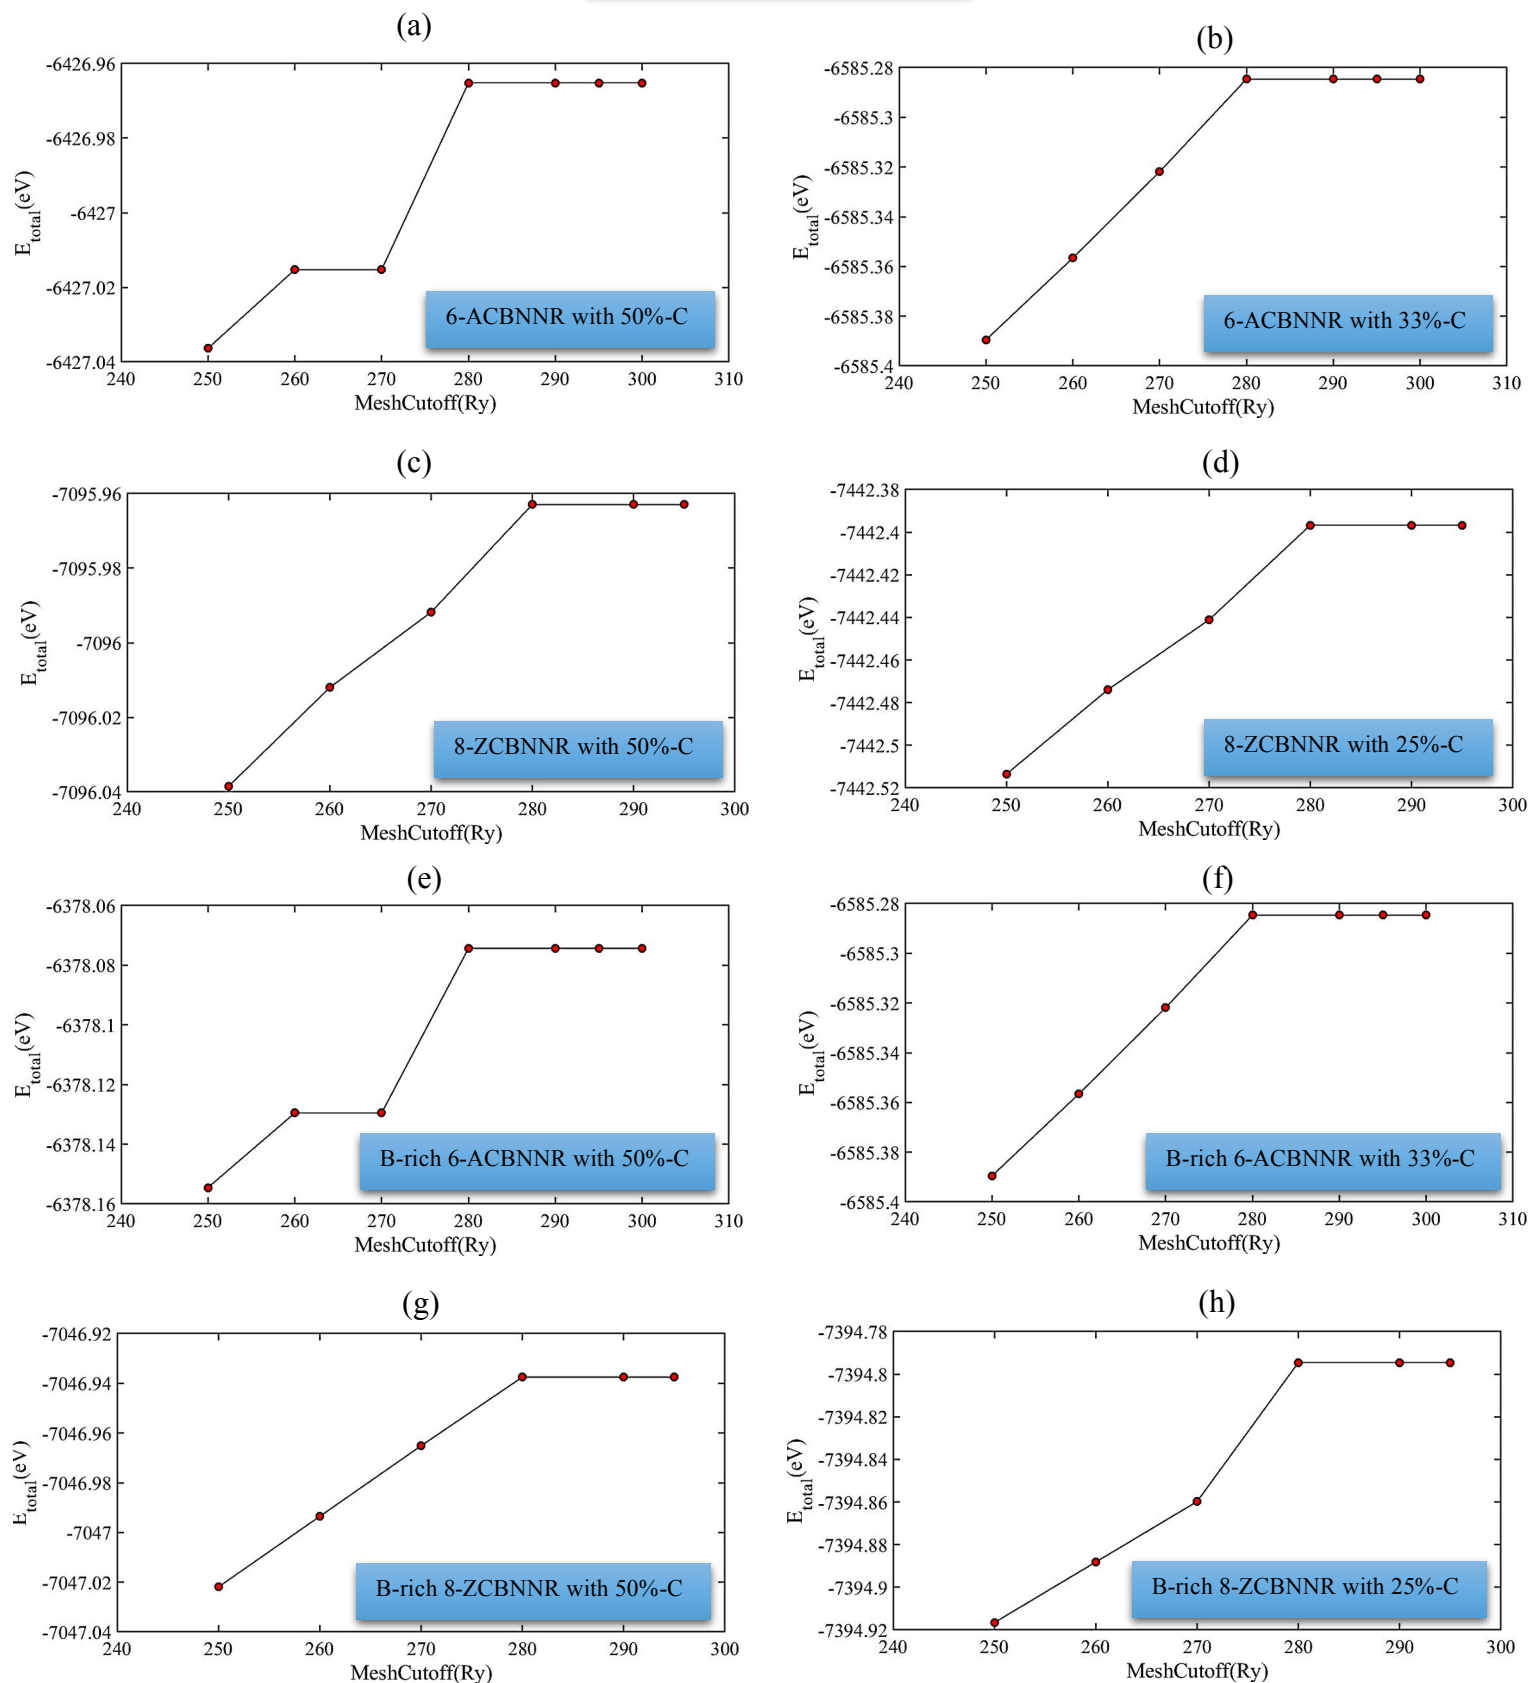

**Fig. S14** The optimized mesh cutoff energy of 6-ACBNRR with 50%-C (a), 6-ACBNRR with 33%-C (b), 8-ZCBNNR with 50%-C (c), 8-ZCBNNR with 25%-C (d), B-rich 6-ACBNRR with 50%-C (e), B-rich 6-ACBNRR with 33%-C (f), B-rich 8-ZCBNNR with 50%-C (g) and B-rich 8-ZCBNNR with 25%-C (h). For all nanoribbons, the optimized mesh cutoff energy is set at 280 Ry.
